# Supplementary material for: Interlaboratory reproducibility of ID-TIMS U–Pb geochronology evaluated with a pre-spiked natural zircon solution
Source: Copernicus journal article supplement (doi:10.5194/egusphere-2025-1001), 2025-03-18
Supplement: Supplementary file 1 [file egusphere-2025-1001-supplement.zip]

## Sheet: Results
	Dates (Ma)							Composition					Isotopic ratios									Instrument		Detector			Mass fractionation (%/amu)					Pb blank composition							Tracer mass (g)		Measured isotopic ratios
	206Pb/	±2σ	207Pb/	±2σ	207Pb/	±2σ		Th/	Pb*	Pbc	Pb*/		206Pb/	206Pb/		207Pb/		207Pb/		Corr.							Alpha	±1σ		Alpha		206Pb/	±1σ	207Pb/	±1σ	208Pb/	±1σ				206Pb/		206Pb/		206Pb/		206Pb/		207Pb/
Sample	238U a	abs	235U a	abs	206Pb a	abs		U b	(pg) c	(pg) d	Pbc e		204Pb f	238U g	±2σ %	235U g	±2σ %	206Pb g	±2σ %	coef.				Pb	U		Pb h	abs		U i		204Pb	abs	204Pb	abs	204Pb	abs				204Pb	±2σ %	207Pb	±2σ %	208Pb	±2σ %	205Pb	±2σ %	205Pb
Lab 0
PLES535_z1	337.056	0.182177	337.205	0.340853	338.229	1.6527		0.104597	80.8341	0.0945333	855.086		56819.4	0.0536769	0.0554748	0.393887	0.118794	0.0532447	0.0653926	0.900292		Triton Plus		F	F		0.0847	0.0253		0.0742911		18.402	0.582	15.41	0.552	35.953	1.324		0.0162		11533.4	0.2691	18.4043	0.010603	27.9544	0.015769	4.92387	0.00578215	0.267551
PLES535_z2	337.049	0.174472	337.147	0.361377	337.824	1.91676		0.104623	80.8404	0.146484	551.87		36677.7	0.0536757	0.0531298	0.393807	0.125965	0.0532352	0.0781803	0.861453		Triton Plus		F	F		0.0847	0.0253		0.0731554		18.402	0.582	15.41	0.552	35.953	1.324		0.0162		10379.5	0.346232	18.3593	0.013851	27.6762	0.0220933	4.92513	0.00699135	0.268258
PLES535_z3	337.234	0.177029	337.437	0.38391	338.838	2.13593		0.104766	80.8755	0.182134	444.045		29513.2	0.053706	0.0538795	0.394206	0.133722	0.053259	0.088579	0.825212		Triton Plus		F	F		0.0847	0.0253		0.0728554		18.402	0.582	15.41	0.552	35.953	1.324		0.0162		9719.73	0.342032	18.3196	0.0182337	27.4579	0.0285265	4.92756	0.00760327	0.268974
PLES535_z4	337.054	0.182247	337.198	0.384277	338.187	2.12635		0.104628	80.8338	0.179119	451.286		29995.9	0.0536766	0.0554965	0.393877	0.13393	0.0532437	0.0881171	0.821058		Triton Plus		F	F		0.0847	0.0253		0.0882589		18.402	0.582	15.41	0.552	35.953	1.324		0.0162		9763.86	0.351567	18.3278	0.0205583	27.5065	0.02935	4.92523	0.00877679	0.268736
PLES535_z5	337.049	0.17876	337.24	0.339633	338.562	1.66118		0.104593	80.8394	0.0918877	879.764		58458.3	0.0536756	0.0544354	0.393935	0.118358	0.0532525	0.0658152	0.899671		Triton Plus		F	F		0.0847	0.0253		0.08066		18.402	0.582	15.41	0.552	35.953	1.324		0.0162		11596.1	0.313444	18.4044	0.0162393	27.9704	0.0240153	4.92412	0.00762705	0.267568
PLES535_z6	337.06	0.181466	337.32	0.557688	339.107	3.69209		0.104926	80.8579	0.403175	200.553		13339.1	0.0536776	0.0552575	0.394044	0.194309	0.0532654	0.159777	0.662826		Triton Plus		F	F		0.0847	0.0253		0.0734317		18.402	0.582	15.41	0.552	35.953	1.324		0.0162		6940.48	0.264778	18.1206	0.0180816	26.3469	0.0234143	4.92995	0.00780627	0.272051
PLES535_z7	337.069	0.173256	337.213	0.355603	338.204	1.86786		0.104643	80.8431	0.132895	608.323		40427.1	0.053679	0.0527562	0.393898	0.123932	0.0532441	0.0758449	0.867415		Triton Plus		F	F		0.0847	0.0253		0.0852527		18.402	0.582	15.41	0.552	35.953	1.324		0.0162		10654.3	0.361171	18.3683	0.0181531	27.7397	0.0260776	4.925	0.00727611	0.268115
PLES535_z8	337.152	0.175926	337.211	0.347316	337.618	1.76833		0.10463	80.8486	0.0760843	1062.62		70605.5	0.0536925	0.0535566	0.393895	0.121044	0.0532304	0.0710339	0.881339		Triton Plus		F	F		0.0847	0.0253		0.0866577		18.402	0.582	15.41	0.552	35.953	1.324		0.0162		12018.4	0.541676	18.426	0.0330597	28.0418	0.0537642	4.92446	0.0124997	0.267269
PLES535_z9	337.099	0.177875	337.155	0.332496	337.542	1.58832		0.104604	80.8309	0.0724944	1114.99		74085.4	0.0536839	0.0541581	0.393819	0.115896	0.0532286	0.0621961	0.912049		Triton Plus		F	F		0.0847	0.0253		0.0825932		18.402	0.582	15.41	0.552	35.953	1.324		0.0162		12109.5	0.301278	18.4281	0.0144718	28.0668	0.0217667	4.92337	0.00714491	0.267154
PLES535_z10	336.981	0.174822	336.925	0.335804	336.534	1.63642		0.104554	80.8194	0.0759012	1064.8		70753.4	0.0536647	0.0532466	0.393503	0.117116	0.0532049	0.0645654	0.908862		Triton Plus		F	F		0.0847	0.0253		0.0823473		18.402	0.582	15.41	0.552	35.953	1.324		0.0162		12021.8	0.395212	18.4326	0.0212047	28.0597	0.0328458	4.92291	0.0101558	0.267059
Lab 1
S1	337.128	0.229802	337.04	0.668364	336.434	4.51335		0.104399	39.9074	0.573147	69.6285		4786.09	0.0536886	0.0699626	0.39366	0.233033	0.0532025	0.196542	0.598742		Phoenix		D	F		0.18	0.03		0.0453152		18.6283	0.317714	15.7963	0.232017	38.5359	0.375848		0.008		3591.66	0.220294	17.5221	0.024844	23.3172	0.0431219	4.93595	0.0142947	0.281705
S2	337.444	0.233363	337.611	0.397194	338.761	1.80809		0.10454	39.9379	0.0592469	674.093		46169.5	0.0537403	0.070982	0.394444	0.138289	0.0532572	0.0729759	0.90615		Phoenix		D	F		0.18	0.03		0.0668043		18.6283	0.317714	15.7963	0.232017	38.5359	0.375848		0.008		11010.7	0.415974	18.3938	0.0274266	27.88	0.0404727	4.92204	0.0135484	0.267585
S3	337.064	0.215918	337.084	0.400956	337.222	1.93261		0.104478	39.9029	0.0672686	593.189		40632.6	0.0536781	0.0657479	0.393721	0.139783	0.0532211	0.0789272	0.902313		Phoenix		D	F		0.18	0.03		0.0640656		18.6283	0.317714	15.7963	0.232017	38.5359	0.375848		0.008		10653.2	0.54492	18.3924	0.0349675	27.8051	0.0588394	4.91826	0.0149566	0.267419
S4	337.112	0.214738	337.105	0.404006	337.06	2.00415		0.104408	39.8966	0.125882	316.936		21718.9	0.0536859	0.0653795	0.39375	0.140839	0.0532172	0.0823272	0.884289		Phoenix		D	F		0.18	0.03		0.0668107		18.6283	0.317714	15.7963	0.232017	38.5359	0.375848		0.008		8664.97	0.396936	18.2882	0.0244672	27.211	0.0504467	4.91957	0.0128131	0.269027
S5	337.456	0.243986	337.475	0.446963	337.606	2.36294		0.104549	39.9444	0.192725	207.261		14208.8	0.0537423	0.0742106	0.394258	0.15567	0.0532301	0.0991586	0.816311		Phoenix		D	F		0.18	0.03		0.0683052		18.6283	0.317714	15.7963	0.232017	38.5359	0.375848		0.008		7158.88	0.44082	18.1579	0.0321761	26.5193	0.0615351	4.92743	0.0182691	0.271283
S6	336.908	0.442057	337.039	0.524109	337.937	2.00728		0.104373	39.9127	0.0992065	402.319		27564.7	0.0536527	0.134668	0.393659	0.182738	0.0532379	0.0824904	0.887414		Phoenix		D	F		0.18	0.03		0.0327879		18.6283	0.317714	15.7963	0.232017	38.5359	0.375848		0.008		9476.71	0.523963	18.3282	0.0374743	27.4991	0.0555603	4.9206	0.0163499	0.268474
S7	337.123	0.22213	337.237	0.410782	338.024	2.00952		0.10452	39.9024	0.112585	354.421		24284.1	0.0536878	0.0676278	0.393931	0.143154	0.0532399	0.0825984	0.888155		Phoenix		D	F		0.18	0.03		0.0851759		18.6283	0.317714	15.7963	0.232017	38.5359	0.375848		0.008		9058.53	0.462886	18.3031	0.0324681	27.3224	0.0552312	4.91957	0.0166364	0.268785
S8	337.414	0.224367	337.669	0.415729	339.43	2.05249		0.104592	39.9417	0.140273	284.741		19512.5	0.0537353	0.0682517	0.394525	0.144721	0.053273	0.0846566	0.880212		Phoenix		D	F		0.18	0.03		0.0770958		18.6283	0.317714	15.7963	0.232017	38.5359	0.375848		0.008		8294.92	0.362253	18.245	0.0256168	27.0289	0.0506903	4.92508	0.0122992	0.269975
S9	337.463	0.22416	337.541	0.429693	338.078	2.21254		0.104455	24.9643	0.0963275	259.161		17762.5	0.0537434	0.0681787	0.394349	0.14963	0.0532412	0.092158	0.857572		Phoenix		D	F		0.18	0.03		0.0829308		18.6283	0.317714	15.7963	0.232017	38.5359	0.375848		0.005		7972.29	0.501544	18.2269	0.0366045	26.9198	0.0483746	4.92604	0.0166321	0.270238
Lab 2A
Pleso_P9	336.951	0.268073	336.839	0.54226	336.069	2.96909		0.104411	80.7794	0.320165	252.306		16072.8	0.0536597	0.0816557	0.393385	0.189161	0.053194	0.126968	0.818376		Phoenix		D	F		0.19	0.04		0.0782243		17.43	0.71	14.73	0.38	35.58	1.04		0.0162		7597.46	0.749332	18.2405	0.0463725	26.9059	0.0463411	4.9196	0.0207861	0.269756
Pleso_P11	337.012	0.253062	337.03	0.488053	337.149	2.43748		0.104403	80.8163	0.189442	426.602		27163.6	0.0536697	0.0770697	0.393647	0.17017	0.0532193	0.102605	0.889159		Phoenix		D	F		0.19	0.04		0.0778274		17.43	0.71	14.73	0.38	35.58	1.04		0.0162		9414.51	0.746591	18.3439	0.0344649	27.5632	0.0385091	4.91957	0.0144495	0.268159
Pleso_P12	337.114	0.163885	337.328	0.36224	338.808	1.90067		0.104683	80.851	0.227814	354.899		22598.2	0.0536863	0.0498965	0.394056	0.126209	0.0532583	0.077427	0.903241		Phoenix		D	F		0.19	0.04		0.0545088		17.43	0.71	14.73	0.38	35.58	1.04		0.0162		6888.73	0.501827	18.2846	0.0281904	27.2621	0.0529316	4.92518	0.0144255	0.269346
Pleso_P13	337.034	0.261655	337.042	0.504699	337.099	2.65054		0.104758	80.8288	0.258242	312.997		19932.5	0.0536732	0.0796819	0.393663	0.175969	0.0532182	0.112425	0.842543		Phoenix		D	F		0.19	0.04		0.0909424		17.43	0.71	14.73	0.38	35.58	1.04		0.0162		8379.07	0.711512	18.286	0.031473	27.1255	0.0419795	4.92097	0.0155623	0.269133
Pleso_P14	336.895	0.255593	336.984	0.478801	337.596	2.37134		0.10463	80.7908	0.178805	451.838		28767.3	0.0536505	0.0778671	0.393583	0.166963	0.0532298	0.0995484	0.883894		Phoenix		D	F		0.19	0.04		0.0888364		17.43	0.71	14.73	0.38	35.58	1.04		0.0162		9613.96	0.613328	18.3546	0.0321156	27.5585	0.0418386	4.91747	0.0159169	0.267959
Pleso_P15	337.075	0.256438	337.012	0.492373	336.574	2.4514		0.104487	80.8269	0.21944	368.333		23455.4	0.05368	0.0780836	0.393622	0.171684	0.0532058	0.103237	0.89019		Phoenix		D	F		0.19	0.04		0.076542		17.43	0.71	14.73	0.38	35.58	1.04		0.0162		8936.22	0.69475	18.3202	0.0286712	27.3921	0.0394664	4.92065	0.0183398	0.268545
Lab 2B
Ples_19	337.058	0.276635	337.565	0.510512	341.056	2.29393		0.105238	80.8321	0.398067	203.061		13047.8	0.0536772	0.0842377	0.394381	0.177763	0.0533114	0.0960145	0.949278		Triton		S	F		0.17	0.04		0.079002		17.1	0.2052	15.07	0.10549	36.17	0.25319		0.0162		6848.04	0.237003	18.0897	0.0204918	26.326	0.0273427	4.92289	0.00796943	0.271659
Ples_20	337.171	0.35043	337.799	0.545062	342.121	2.24956		0.104536	80.8528	0.324413	249.228		16013.3	0.0536957	0.106674	0.394703	0.189683	0.0533365	0.0939636	0.926214		Triton		S	F		0.17	0.04		0.108372		17.1	0.2052	15.07	0.10549	36.17	0.25319		0.0162		7588.03	0.252786	18.0765	0.0220184	26.8305	0.0325841	4.92385	0.0080201	0.270848
Ples_23*	337.095	0.186322	337.097	0.298475	337.113	1.63692		0.104801	80.8379	0.289518	279.216		17938.6	0.0536832	0.0567308	0.393739	0.104052	0.0532187	0.0645984	0.747508		Triton		F	F		0.07	0.02		0.0618348		17.1	0.2052	15.07	0.10549	36.17	0.25319		0.0162		7971.94	0.337977	18.2187	0.0264941	26.8973	0.0369631	4.92775	0.00923826	0.270304
Ples_26ss	337.25	0.288446	337.691	0.530682	340.727	2.42462		0.104972	80.9185	0.272444	297.009		19078.2	0.0537085	0.0877857	0.394554	0.184728	0.0533037	0.102081	0.936178		Triton		S	F		0.17	0.04		0.129887		17.1	0.2052	15.07	0.10549	36.17	0.25319		0.0162		8216.51	0.531413	18.2353	0.0257165	26.9953	0.0354451	4.92652	0.0146611	0.270133
Ples_27ss	337.191	0.290673	337.647	0.522236	340.789	2.349		0.105123	80.9447	0.371838	217.688		13987	0.0536989	0.0884784	0.394494	0.181808	0.0533051	0.0985725	0.936176		Triton		S	F		0.17	0.04		0.0962612		17.1	0.2052	15.07	0.10549	36.17	0.25319		0.0162		7097.97	0.390368	18.137	0.0204995	26.4758	0.0227287	4.9295	0.0113788	0.271629
Lab 4A
z1 A	337.406	0.213664	337.388	0.366115	337.265	1.48963		0.1039	77.6481	0.122125	635.809		42556.4	0.053734	0.0649818	0.394138	0.12754	0.0532223	0.0657517	0.975703		Isoprobe-T		D	F		0.175	0.03		0.083785		18.04	0.110044	15.54	0.080808	37.69	0.237447		0.0162		10784	0.445527	18.3979	0.0259021	-	-	4.9236	0.0149591	0.267575
z2 A	337.173	0.216675	337.232	0.371781	337.641	1.54379		0.104311	77.6334	0.175808	441.58		29557.8	0.0536959	0.0659419	0.393924	0.129564	0.0532311	0.068147	0.965508		Isoprobe-T		D	F		0.175	0.03		0.0939278		18.04	0.110044	15.54	0.080808	37.69	0.237447		0.0162		9699.57	0.511833	18.3442	0.025435	-	-	4.92296	0.0145052	0.268515
z3 A	337.216	0.211483	337.41	0.367971	338.746	1.50959		0.10409	77.6343	0.201136	385.979		25839.4	0.053703	0.0643536	0.394169	0.128179	0.053257	0.0666505	0.978106		Isoprobe-T		D	F		0.175	0.03		0.0817323		18.04	0.110044	15.54	0.080808	37.69	0.237447		0.0162		9262.02	0.405579	18.3118	0.0199496	-	-	4.92365	0.00920867	0.268818
z4 A	337.245	0.212624	337.365	0.366802	338.195	1.50044		0.104074	77.6374	0.148174	523.961		35070.8	0.0537077	0.0646953	0.394107	0.127786	0.0532441	0.06624	0.975803		Isoprobe-T		D	F		0.175	0.03		0.0895126		18.04	0.110044	15.54	0.080808	37.69	0.237447		0.0162		10228.5	0.419542	18.3659	0.0212897	-	-	4.92302	0.0105801	0.267983
z1 B	337.278	0.210442	337.299	0.363711	337.448	1.47874		0.104312	78.9334	0.10693	738.178		49399.2	0.0537131	0.0640256	0.394017	0.12673	0.0532265	0.0652733	0.980195		Isoprobe-T		D	F		0.175	0.03		0.0867303		18.04	0.110044	15.54	0.080808	37.69	0.237447		0.0162		11174.7	0.458861	18.4124	0.025598	-	-	4.92215	0.011419	0.267328
z2 B	337.109	0.223886	337.126	0.37257	337.24	1.51622		0.103944	81.3206	0.12878	631.468		42265.4	0.0536856	0.0681488	0.393779	0.129873	0.0532217	0.0669251	0.962558		Isoprobe-T		D	F		0.175	0.03		0.0864046		18.04	0.110044	15.54	0.080808	37.69	0.237447		0.0162		10760.4	0.66749	18.3972	0.053661	-	-	4.92065	0.0220966	0.267439
z3 B	337.196	0.210064	337.261	0.36464	337.709	1.49378		0.104326	78.4259	0.129116	607.405		40650.5	0.0536997	0.0639255	0.393964	0.127066	0.0532327	0.0659402	0.97821		Isoprobe-T		D	F		0.175	0.03		0.0855988		18.04	0.110044	15.54	0.080808	37.69	0.237447		0.0162		10653.1	0.308142	18.3888	0.0167845	-	-	4.9211	0.0102312	0.267606
z4 B	337.124	0.209654	337.168	0.363362	337.476	1.48076		0.104443	80.206	0.119382	671.844		44959.9	0.0536879	0.0638143	0.393836	0.12665	0.0532272	0.0653629	0.980415		Isoprobe-T		D	F		0.175	0.03		0.0878992		18.04	0.110044	15.54	0.080808	37.69	0.237447		0.0162		10927.8	0.264207	18.4023	0.0173509	-	-	4.92082	0.0105147	0.267403
z5 B	337.113	0.213973	337.051	0.365953	336.618	1.49188		0.104265	76.8026	0.103788	739.998		49522.4	0.0536862	0.0651306	0.393676	0.127591	0.0532071	0.0658435	0.974305		Isoprobe-T		D	F		0.175	0.03		0.0890751		18.04	0.110044	15.54	0.080808	37.69	0.237447		0.0162		11178.1	0.529904	18.4191	0.0206801	-	-	4.92051	0.0152133	0.266989
Lab 4B
z6 A	337.233	0.253335	337.448	0.444067	338.928	1.79387		0.104003	77.6395	0.104492	743.02		49726	0.0537058	0.0770855	0.39422	0.154672	0.0532613	0.0792043	0.989647		Phoenix		D	F		0.182	0.037		0.0887075		18.04	0.110044	15.54	0.080808	37.69	0.237447		0.0162		11190.3	0.435621	18.4026	0.0259101	-	-	4.92209	0.0108942	0.267511
z7 A	337.152	0.253991	337.199	0.443842	337.523	1.80272		0.104343	77.6306	0.104073	745.926		49916.9	0.0536925	0.0768834	0.393879	0.15469	0.0532283	0.0795751	0.988583		Phoenix		D	F		0.182	0.037		0.0885081		18.04	0.110044	15.54	0.080808	37.69	0.237447		0.0162		11198.4	0.294112	18.4141	0.017663	-	-	4.92118	0.00889272	0.26728
z8 A	337.442	0.257874	337.852	0.447597	340.673	1.80786		0.104502	77.7063	0.121102	641.661		42937.2	0.0537399	0.0784191	0.394775	0.155744	0.0533024	0.0798466	0.98404		Phoenix		D	F		0.182	0.037		0.0923885		18.04	0.110044	15.54	0.080808	37.69	0.237447		0.0162		10810.8	0.40929	18.3734	0.0227152	-	-	4.9257	0.0140545	0.268149
z9 A	337.264	0.254351	337.585	0.445182	339.801	1.80756		0.104207	77.6427	0.101341	766.156		51269.7	0.0537108	0.0772781	0.394409	0.155007	0.0532818	0.0798209	0.986523		Phoenix		D	F		0.182	0.037		0.0865597		18.04	0.110044	15.54	0.080808	37.69	0.237447		0.0162		11266.4	0.39602	18.3987	0.0200438	-	-	4.92185	0.00979586	0.267595
z10 A	337.183	0.256339	337.566	0.444305	340.208	1.78986		0.104916	77.6444	0.103025	753.645		50421.9	0.0536976	0.0774056	0.394383	0.154709	0.0532914	0.0790452	0.988909		Phoenix		D	F		0.182	0.037		0.0886646		18.04	0.110044	15.54	0.080808	37.69	0.237447		0.0162		11223.2	0.330549	18.3938	0.0196352	-	-	4.92092	0.0111889	0.267559
z6 B	337.127	0.254568	337.387	0.447291	339.175	1.82697		0.104227	76.0017	0.104243	729.085		48790.3	0.0536885	0.078023	0.394137	0.155818	0.0532672	0.0806692	0.98154		Phoenix		D	F		0.182	0.037		0.0932572		18.04	0.110044	15.54	0.080808	37.69	0.237447		0.0162		11139.3	0.428557	18.3987	0.0248734	-	-	4.92046	0.0142373	0.267437
z7 B	337.205	0.255439	337.452	0.447218	339.15	1.82761		0.104631	71.191	0.125384	567.785		37995.6	0.0537012	0.0774669	0.394226	0.155768	0.0532666	0.0806972	0.984489		Phoenix		D	F		0.182	0.037		0.102562		18.04	0.110044	15.54	0.080808	37.69	0.237447		0.0162		10463.3	0.372604	18.3704	0.0253396	-	-	4.92319	0.0110109	0.26799
z8 B	337.088	0.256633	337.345	0.445771	339.114	1.81345		0.104703	73.5818	0.0877578	838.465		56099.5	0.053682	0.0777583	0.394079	0.155305	0.0532658	0.0800712	0.9838		Phoenix		D	F		0.182	0.037		0.0961228		18.04	0.110044	15.54	0.080808	37.69	0.237447		0.0162		11480.7	0.422398	18.4123	0.0219402	-	-	4.91993	0.0100865	0.267201
z9 B	337.052	0.256633	337.479	0.446122	340.419	1.8095		0.104541	79.7026	0.087736	908.437		60780.8	0.0536762	0.0781296	0.394263	0.155375	0.0532964	0.0799157	0.982986		Phoenix		D	F		0.182	0.037		0.0982299		18.04	0.110044	15.54	0.080808	37.69	0.237447		0.0162		11662	0.451229	18.4086	0.0268993	-	-	4.91839	0.0127857	0.26718
Lab 5A
a7	337.117	0.232456	337.26	0.429838	338.245	2.27385		0.104278	80.83	0.1201	673.024		45046.8	0.0536868	0.0707728	0.393962	0.149786	0.0532451	0.0950498	0.819166		Triton		S	F		0.14	0.02		0.0754887		18.0998	0.135	15.3452	0.068	37.8244	0.2		0.0162		10932.4	0.670876	18.3897	0.0410756	27.9188	0.0721066	4.92174	0.0133432	0.26761
a8	337.285	0.186382	337.633	0.353307	340.036	1.82319		0.104425	80.8771	0.12638	639.951		42830.6	0.0537142	0.0567178	0.394475	0.123002	0.0532872	0.0737567	0.850285		Triton		S	F		0.14	0.02		0.0810743		18.0998	0.135	15.3452	0.068	37.8244	0.2		0.0162		10827.2	0.818969	18.3717	0.0412782	27.8492	0.0863729	4.92431	0.0241418	0.268035
a9	337.105	0.185491	337.533	0.307091	340.481	1.48171		0.104553	80.8304	0.0805882	1003		67115.5	0.0536848	0.056476	0.394337	0.106939	0.0532977	0.0569186	0.856299		Triton		S	F		0.14	0.02		0.0820202		18.0998	0.135	15.3452	0.068	37.8244	0.2		0.0162		11897.9	0.503836	18.4091	0.0269467	28.0606	0.0491453	4.92048	0.018993	0.267286
a10	337.095	0.180975	337.445	0.32011	339.86	1.67621		0.104725	80.8377	0.0713246	1133.38		75834.2	0.0536833	0.0551025	0.394217	0.111497	0.0532831	0.0666079	0.812915		Triton		S	F		0.14	0.02		0.0819523		18.0998	0.135	15.3452	0.068	37.8244	0.2		0.0162		12157.5	0.62123	18.4227	0.0379562	28.0688	0.0666194	4.92059	0.0239518	0.267099
a11	337.086	0.175323	337.624	0.325897	341.329	1.6974		0.104478	80.8297	0.200837	402.464		26941.6	0.0536817	0.0533832	0.394462	0.113463	0.0533177	0.0676679	0.833912		Triton		S	F		0.14	0.02		0.0773598		18.0998	0.135	15.3452	0.068	37.8244	0.2		0.0162		9410.91	0.520613	18.2956	0.0266416	27.4492	0.0779982	4.92243	0.0185263	0.269057
a12	337.05	0.19892	337.295	0.408133	338.984	2.08554		0.104255	80.7744	0.118305	682.765		45698.1	0.0536759	0.0605742	0.39401	0.14221	0.0532625	0.0862367	0.894656		Triton		S	F		0.14	0.02		0.0647133		18.0998	0.135	15.3452	0.068	37.8244	0.2		0.0162		11006.7	1.03245	18.3766	0.0295598	27.9013	0.0842679	4.92123	0.0174391	0.267809
a13	337.258	0.167832	337.642	0.308817	340.284	1.60226		0.104524	80.8565	0.124249	650.761		43552.2	0.0537099	0.0510768	0.394487	0.107511	0.0532931	0.0629646	0.834075		Triton		S	F		0.14	0.02		0.0781955		18.0998	0.135	15.3452	0.068	37.8244	0.2		0.0162		10869.6	0.618368	18.3719	0.0303746	27.8358	0.057981	4.92285	0.0181666	0.267959
a14	336.976	0.170384	337.346	0.3119	339.897	1.59686		0.104449	80.7828	0.101541	795.569		53241.1	0.0536637	0.0518956	0.39408	0.108665	0.0532839	0.0626912	0.844837		Triton		S	F		0.14	0.02		0.0748799		18.0998	0.135	15.3452	0.068	37.8244	0.2		0.0162		11368.8	0.538481	18.3948	0.0295031	27.9719	0.0523709	4.91814	0.0192686	0.267367
a15	337.176	0.167807	337.381	0.382487	338.795	2.12971		0.104152	80.8179	0.177304	455.815		30515.2	0.0536965	0.0510813	0.394129	0.133245	0.053258	0.0883127	0.846406		Triton		S	F		0.14	0.02		0.0671312		18.0998	0.135	15.3452	0.068	37.8244	0.2		0.0162		9814.27	0.849577	18.3389	0.0578938	27.643	0.0946966	4.92207	0.0159635	0.268438
a22	337.134	0.17842	337.587	0.306675	340.714	1.49158		0.104605	80.8644	0.0956524	845.399		56571.1	0.0536895	0.0543185	0.394412	0.10678	0.0533032	0.0574225	0.86313		Triton		S	F		0.14	0.02		0.0989923		18.0998	0.135	15.3452	0.068	37.8244	0.2		0.0162		11525.3	0.432507	18.394	0.0252456	27.968	0.0460395	4.9227	0.0159962	0.267627
Lab 5B
a2	337.03	0.188104	336.919	0.329467	336.148	1.53198		0.104006	80.797	0.15885	508.637		34052.8	0.0536727	0.0572838	0.393494	0.114908	0.0531958	0.059399	0.905026		Phoenix		F	F		0.06	0.025		0.0774027		18.0998	0.135	15.3452	0.068	37.8244	0.2		0.0162		10158.8	0.289158	18.3586	0.0227817	27.7316	0.0288612	4.92492	0.0098679	0.268262
a3	337.109	0.197027	337.064	0.33799	336.754	1.56476		0.104258	80.8104	0.175117	461.465		30893.6	0.0536855	0.0599877	0.393694	0.117837	0.0532101	0.0610488	0.899348		Phoenix		F	F		0.06	0.025		0.0658062		18.0998	0.135	15.3452	0.068	37.8244	0.2		0.0162		9861.06	0.437792	18.3394	0.0267561	27.5863	0.0381216	4.92558	0.00844406	0.26858
a4	337.11	0.190737	337.144	0.330399	337.383	1.53125		0.104191	80.8144	0.158304	510.5		34174.7	0.0536857	0.0580725	0.393804	0.115168	0.0532248	0.0593789	0.902172		Phoenix		F	F		0.06	0.025		0.0779603		18.0998	0.135	15.3452	0.068	37.8244	0.2		0.0162		10174.7	0.47219	18.3494	0.0238782	27.6904	0.0327053	4.92558	0.00764605	0.268432
a5	337.156	0.204945	337.259	0.341268	337.973	1.60401		0.104237	80.7989	0.147969	546.054		36552.5	0.0536931	0.06239	0.393961	0.118922	0.0532387	0.0630192	0.87748		Phoenix		F	F		0.06	0.025		0.0774714		18.0998	0.135	15.3452	0.068	37.8244	0.2		0.0162		10371.2	0.369873	18.3539	0.0314001	27.7332	0.0460901	4.92433	0.0105016	0.268299
a16	337.109	0.193143	337.211	0.327718	337.919	1.45624		0.104367	80.8126	0.117067	690.309		46202.4	0.0536855	0.0588052	0.393896	0.114214	0.0532374	0.0555881	0.920905		Phoenix		F	F		0.06	0.025		0.0738394		18.0998	0.135	15.3452	0.068	37.8244	0.2		0.0162		11023.8	0.233606	18.382	0.0135179	27.8657	0.0178463	4.92447	0.00629837	0.267897
a17	337.175	0.192207	337.192	0.323294	337.312	1.48969		0.104335	80.8209	0.117898	685.515		45882.7	0.0536963	0.0585089	0.39387	0.112677	0.0532232	0.0572812	0.89462		Phoenix		F	F		0.06	0.025		0.0715444		18.0998	0.135	15.3452	0.068	37.8244	0.2		0.0162		10996.7	0.326773	18.3861	0.0190575	27.8721	0.0210429	4.92511	0.00807549	0.267871
a18	337.133	0.182924	337.271	0.321904	338.23	1.44001		0.104472	80.8127	0.090822	889.792		59546.3	0.0536894	0.0556899	0.393978	0.112171	0.0532447	0.0547618	0.931857		Phoenix		F	F		0.06	0.025		0.0672495		18.0998	0.135	15.3452	0.068	37.8244	0.2		0.0162		11644.2	0.181478	18.4031	0.0113403	27.9803	0.0150656	4.92386	0.00478577	0.267557
a20	337.225	0.18957	337.221	0.33046	337.189	1.5349		0.104058	80.8455	0.121198	667.053		44651.2	0.0537045	0.057698	0.393908	0.115167	0.0532203	0.0595597	0.903143		Phoenix		F	F		0.06	0.025		0.076952		18.0998	0.135	15.3452	0.068	37.8244	0.2		0.0162		10937.6	0.292434	18.3843	0.0249238	27.9206	0.0458657	4.92707	0.00780471	0.268004
a27	337.307	0.197018	337.54	0.351015	339.143	1.71403		0.104344	80.879	0.575356	140.572		9422.73	0.0537178	0.0599505	0.394346	0.122233	0.0532662	0.0684483	0.873865		Phoenix		F	F		0.06	0.025		0.0777043		18.0998	0.135	15.3452	0.068	37.8244	0.2		0.0162		5712.92	0.250725	17.9725	0.0219139	25.6336	0.0343833	4.93596	0.0128187	0.27464
a28	337.041	0.186515	336.974	0.342814	336.512	1.65196		0.103798	80.7917	0.210804	383.255		25664.3	0.0536745	0.0567981	0.393571	0.119546	0.0532044	0.0653671	0.898518		Phoenix		F	F		0.06	0.025		0.0744177		18.0998	0.135	15.3452	0.068	37.8244	0.2		0.0162		9257.06	0.582263	18.3095	0.0144045	27.5051	0.0382568	4.92572	0.00529308	0.269026
Lab 10
A	337.362	0.232789	337.517	0.412267	338.581	1.79198		0.104987	74.8727	0.310284	241.304		16156.7	0.0537269	0.0708035	0.394315	0.143571	0.0532532	0.0791158	0.952433		Nu		D	F		0.15	0.04		0.105542		18.242	0.134991	15.737	0.0975694	37.886	0.314454		0.0162		7625.14	0.430337	18.1962	0.0252936	-	-	4.92526	0.0157996	0.28221
B	337.253	0.233066	337.236	0.413456	337.119	1.8019		0.105102	74.9758	0.316751	236.703		15848.9	0.053709	0.0709104	0.393929	0.144086	0.0532188	0.0795331	0.95235		Nu		D	F		0.15	0.04		0.0916851		18.242	0.134991	15.737	0.0975694	37.886	0.314454		0.0162		7561.26	0.53698	18.2022	0.020432	-	-	4.93213	0.017759	0.29485
C	337.119	0.235054	337.308	0.420307	338.61	1.84333		0.103536	74.6077	0.354768	210.3		14089.1	0.0536871	0.0715429	0.394028	0.146447	0.0532538	0.0813835	0.951535		Nu		D	F		0.15	0.04		0.042367		18.242	0.134991	15.737	0.0975694	37.886	0.314454		0.0162		7120.2	0.503748	18.1515	0.025304	-	-	4.91073	0.0189968	0.283004
D	337.131	0.231659	337.303	0.408741	338.492	1.74428		0.103699	74.8466	0.311612	240.191		16088.4	0.0536891	0.0705071	0.394022	0.142419	0.0532511	0.0770087	0.962063		Nu		D	F		0.15	0.04		0.0898862		18.242	0.134991	15.737	0.0975694	37.886	0.314454		0.0162		7610.65	0.429796	18.1957	0.0242312	-	-	4.92543	0.0163968	0.286886
E	337.271	0.232358	337.331	0.413685	337.741	1.84159		0.105412	74.8967	0.291309	257.104		17211.6	0.053712	0.070691	0.39406	0.144132	0.0532335	0.0812939	0.940231		Nu		D	F		0.15	0.04		0.103009		18.242	0.134991	15.737	0.0975694	37.886	0.314454		0.0162		7853.33	0.459698	18.2211	0.0238996	-	-	4.92597	0.0179698	0.294449
Lab 11
Pl535-III	337.053	0.183474	336.822	0.429093	335.227	3.1608		0.103126	77.4304	0.86733	89.2745		6133.58	0.0536764	0.0558703	0.393362	0.14969	0.0531742	0.13566	0.36337		Phoenix		D	F		0.227	0.02		0.0673676		18.6994	0.3	15.6288	0.3	38.63	0.6		0.01554		4289.07	0.537059	17.754	0.0218879	-	-	4.92573	0.0151371	0.277386
Pl535-IV	337.094	0.253518	336.906	0.538489	335.604	3.81766		0.103006	77.1239	1.05056	73.4121		5047.22	0.0536831	0.0771905	0.393476	0.187814	0.0531831	0.165323	0.443304		Phoenix		D	F		0.227	0.02		0.0336964		18.6994	0.3	15.6288	0.3	38.63	0.6		0.01548		3730.34	0.601886	17.5956	0.034414	-	-	4.92861	0.0264659	0.280111
Pl535-IX	336.955	0.203968	337.295	0.479147	339.638	3.26523		0.104127	87.3069	0.783764	111.394		7645.72	0.0536603	0.0621284	0.39401	0.166954	0.0532779	0.140508	0.527537		Phoenix		D	F		0.227	0.02		0.0558568		18.6994	0.3	15.6288	0.3	38.63	0.6		0.01753		4985.44	0.298875	17.8768	0.0249407	-	-	4.91865	0.0274765	0.275187
Pl535-V	337.04	0.205407	336.478	0.929644	332.594	7.12577		0.101721	85.7121	1.73502	49.4013		3404.04	0.0536742	0.0625516	0.392889	0.324589	0.0531125	0.312597	0.258726		Phoenix		D	F		0.227	0.02		0.0713638		18.6994	0.3	15.6288	0.3	38.63	0.6		0.0172		2748.7	0.421363	17.1998	0.0338765	-	-	4.94073	0.0323033	0.287336
Pl535-VI	336.828	0.17826	337.278	0.478978	340.382	3.28411		0.104084	85.726	0.812403	105.522		7243.59	0.0536396	0.0543178	0.393987	0.166902	0.0532954	0.141383	0.538852		Phoenix		D	F		0.227	0.02		0.0572443		18.6994	0.3	15.6288	0.3	38.63	0.6		0.01721		4811.06	0.357318	17.8379	0.0268697	-	-	4.92003	0.0228251	0.275869
Pl535-VII	336.954	0.237726	337.245	0.604448	339.257	4.27858		0.103602	84.001	1.02842	81.6799		5612.12	0.0536602	0.0724115	0.393943	0.21064	0.0532689	0.186129	0.456349		Phoenix		D	F		0.227	0.02		0.0176985		18.6994	0.3	15.6288	0.3	38.63	0.6		0.01686		4034.33	0.370153	17.6679	0.0311292	-	-	4.92562	0.0291887	0.278931
Pl535-VIII	336.813	0.194257	337.057	0.362428	338.742	2.48625		0.104059	87.7171	0.781885	112.187		7700.27	0.0536372	0.0591948	0.393685	0.12636	0.0532568	0.104893	0.496072		Phoenix		D	F		0.227	0.02		0.048104		18.6994	0.3	15.6288	0.3	38.63	0.6		0.01762		4977.84	0.498639	17.8828	0.0296182	-	-	4.91662	0.0241303	0.274906
PL535-X	336.891	0.184406	337.476	0.682951	341.509	5.10047		0.104296	74.7677	1.07039	69.8509		4800.86	0.0536499	0.0561805	0.394259	0.23786	0.0533219	0.222966	0.335717		Phoenix		D	F		0.227	0.02		0.0816949		18.6994	0.3	15.6288	0.3	38.63	0.6		0.015		3589.82	0.341908	17.5066	0.0263341	-	-	4.92939	0.026689	0.281565
Lab 13
Ples_IC_2	337.004	0.171047	337.489	0.358689	340.836	2.00969		0.104544	80.8186	0.185402	435.909		29423.5	0.0536683	0.0520935	0.394278	0.124921	0.0533062	0.0826538	0.802148		Triton Plus		S	F		0.15	0.02		0.0764994		18.508	0.288472	15.7448	0.224286	37.6257	0.557741		0.0162		9685.01	0.766746	18.2986	0.0342071	27.5052	0.038253	4.92101	0.0153661	0.268739
Ples_IC_3	336.927	0.236124	337.558	0.572286	341.911	3.40696		0.104424	80.776	0.234242	344.84		23280.5	0.0536558	0.071929	0.394372	0.199276	0.0533316	0.146986	0.775536		Triton Plus		S	F		0.15	0.02		0.0484997		18.508	0.288472	15.7448	0.224286	37.6257	0.557741		0.0162		8899.02	1.15715	18.2643	0.0644561	27.3076	0.0748756	4.9193	0.028258	0.26942
Ples_IC_4	337.041	0.217643	337.598	0.5787	341.434	3.4795		0.104696	80.8125	0.197104	410		27674.2	0.0536744	0.0662774	0.394426	0.20149	0.0533203	0.150252	0.800046		Triton Plus		S	F		0.15	0.02		0.0729462		18.508	0.288472	15.7448	0.224286	37.6257	0.557741		0.0162		9457.29	1.43857	18.2903	0.0696369	27.4286	0.0763782	4.92056	0.0338752	0.268939
Ples_IC_5	337.156	0.218758	337.515	0.511799	339.995	2.95215		0.104396	80.7707	0.207737	388.813		26248.1	0.0536931	0.066595	0.394313	0.178233	0.0532864	0.12629	0.809035		Triton Plus		S	F		0.15	0.02		0.0541361		18.508	0.288472	15.7448	0.224286	37.6257	0.557741		0.0162		9327.95	1.13486	18.3006	0.0552195	27.4527	0.064078	4.91878	0.0355783	0.26882
Ples_IC_7	337.058	0.189612	337.658	0.439863	341.794	2.52572		0.104477	80.8311	0.101579	795.743		53696.6	0.0536772	0.0577386	0.394509	0.153127	0.0533288	0.106778	0.81056		Triton Plus		S	F		0.15	0.02		0.0731425		18.508	0.288472	15.7448	0.224286	37.6257	0.557741		0.0162		11406.7	1.0073	18.3822	0.0392566	27.9817	0.037774	4.92037	0.0220916	0.267702
Ples_IC_8	337.003	0.164728	337.403	0.313518	340.165	1.61391		0.104553	80.8714	0.0902199	896.381		60486.1	0.0536682	0.0501692	0.39416	0.109212	0.0532904	0.0635038	0.854548		Triton Plus		S	F		0.15	0.02		0.0935527		18.508	0.288472	15.7448	0.224286	37.6257	0.557741		0.0162		11673.2	0.530756	18.404	0.0243975	28.0237	0.0364438	4.92269	0.0172778	0.267487
Ples_IC_11	337.074	0.184811	337.356	0.36585	339.297	2.09063		0.104403	80.7925	0.306257	263.806		17815.3	0.0536798	0.056274	0.394094	0.127458	0.05327	0.0864548	0.759179		Triton Plus		S	F		0.15	0.02		0.063669		18.508	0.288472	15.7448	0.224286	37.6257	0.557741		0.0162		7973.74	0.647833	18.2123	0.0298534	26.9541	0.03739	4.92181	0.0183425	0.270209
Ples_IC_13	336.951	0.181155	337.669	0.381654	342.613	2.26751		0.104197	80.7166	0.284111	284.102		19184.3	0.0536597	0.0551802	0.394524	0.132859	0.0533481	0.0948112	0.727032		Triton Plus		S	F		0.15	0.02		0.0629334		18.508	0.288472	15.7448	0.224286	37.6257	0.557741		0.0162		8240.27	0.812025	18.2376	0.0352472	27.1026	0.0454101	4.91676	0.0168801	0.270029
Ples_IC_14	337.059	0.171931	337.679	0.36293	341.955	1.95655		0.104568	80.6763	0.214402	376.285		25400.6	0.0536773	0.0523544	0.394538	0.126338	0.0533326	0.0801463	0.849033		Triton Plus		S	F		0.15	0.02		0.04637		18.508	0.288472	15.7448	0.224286	37.6257	0.557741		0.0162		9201.58	0.659741	18.2758	0.0310694	27.3629	0.0365756	4.91269	0.0157755	0.26881
Ples_IC_15	337.149	0.166579	337.697	0.34432	341.475	1.85828		0.104529	80.8382	0.190801	423.678		28598.1	0.0536921	0.0507114	0.394563	0.119854	0.0533213	0.075437	0.838987		Triton Plus		S	F		0.15	0.02		0.0742108		18.508	0.288472	15.7448	0.224286	37.6257	0.557741		0.0162		9578.76	0.553354	18.3034	0.0259436	27.5048	0.0309201	4.92225	0.0145111	0.268951
Lab 14
	336.946	0.776591	337.054	0.941896	337.783	3.5555		0.103849	80.819	0.356107	226.942		15497.3	0.0536589	0.230479	0.393679	0.27945	0.0532108	0.156952	0.827381		Micromass S54		D	D		0.194	0.059		0.0563976		18.572	0.195	15.7309	0.215	38.3802	0.485		0.0162		7467.48	0.834234	18.2021	0.0406005	26.7276	0.10002	4.92216	0.026182	0.270427
	336.708	0.471964	337.037	1.02062	339.277	5.8989		0.103536	40.3713	0.730613	55.2531		3787.01	0.05362	0.14017	0.393656	0.302821	0.0532463	0.260465	0.512484		Micromass S54		D	D		0.194	0.059		0.0774812		18.572	0.195	15.7309	0.215	38.3802	0.485		0.0081		2995.69	0.419659	17.2699	0.036667	22.2333	0.10407	4.93518	0.0218065	0.285632
	337.336	0.676251	337.056	1.57597	335.127	9.23135		0.105014	40.3685	1.29156	31.253		2150.35	0.0537226	0.200468	0.393683	0.467569	0.0531482	0.407313	0.495579		Micromass S54		D	D		0.194	0.059		0.115621		18.572	0.195	15.7309	0.215	38.3802	0.485		0.0081		1868.85	0.319689	16.4588	0.0442462	19.0415	0.116864	4.95377	0.0206884	0.301187
	336.949	0.464036	337.561	1.03715	341.767	6.03015		0.103226	40.3999	0.790779	51.0851		3502.17	0.0536593	0.137717	0.394376	0.307247	0.0533045	0.26638	0.501128		Micromass S54		D	D		0.194	0.059		0.134251		18.572	0.195	15.7309	0.215	38.3802	0.485		0.0081		2814.65	0.203352	17.1595	0.0323164	21.7858	0.0938984	4.93982	0.0147422	0.288211
	337.279	0.455492	337.609	0.980468	339.846	5.65761		0.103061	40.3932	0.694918	58.1224		3983.19	0.0537133	0.135049	0.394441	0.290416	0.0532598	0.249835	0.512002		Micromass S54		D	D		0.194	0.059		0.130714		18.572	0.195	15.7309	0.215	38.3802	0.485		0.0081		3117.76	0.362292	17.3232	0.0368131	22.5548	0.07399	4.93727	0.0164492	0.28501
	337.628	0.501694	337.568	0.858421	337.142	4.56403		0.103536	40.3599	0.52504	76.8643		5262.53	0.0537703	0.148594	0.394386	0.254296	0.0531958	0.201449	0.610858		Micromass S54		D	D		0.194	0.059		0.0288561		18.572	0.195	15.7309	0.215	38.3802	0.485		0.0081		3851.13	0.248056	17.6158	0.0255363	23.8661	0.0345669	4.92855	0.0165321	0.279341
	337.227	0.481203	337.716	0.852313	341.056	4.62309		0.102302	40.3777	0.421197	95.8566		6557.37	0.0537048	0.142694	0.394588	0.252376	0.0532881	0.204197	0.588114		Micromass S54		D	D		0.194	0.059		0.0937103		18.572	0.195	15.7309	0.215	38.3802	0.485		0.0081		4503.2	0.66142	17.7596	0.0471212	24.6797	0.04983	4.92671	0.020749	0.277285
Lab 15
z1	337.194	0.205409	337.445	0.361023	339.176	2.03251		0.104407	80.8501	0.243275	332.34		22032.2	0.0536993	0.0625243	0.394216	0.125748	0.0532672	0.083874	0.742002		Phoenix		D	F		0.18	0.02		0.0730784		18.1458	0.475155	15.3039	0.295535	37.1078	0.875051		0.0162		8731.77	0.711929	18.2821	0.042193	27.2786	0.0552173	4.92279	0.0233453	0.269294
z2	337.036	0.174009	337.194	0.34598	338.282	2.08751		0.104519	80.8246	0.251903	320.856		21271.2	0.0536735	0.0529906	0.393871	0.120584	0.0532462	0.0864521	0.692919		Phoenix		D	F		0.18	0.02		0.0721956		18.1458	0.475155	15.3039	0.295535	37.1078	0.875051		0.0162		8614.44	0.861683	18.2822	0.0488557	27.2136	0.0466553	4.92132	0.0213436	0.269225
z4	337.226	0.168969	337.336	0.355736	338.097	2.07157		0.104604	80.8897	0.269199	300.483		19921.3	0.0537046	0.0514277	0.394067	0.12394	0.0532418	0.0856981	0.756396		Phoenix		D	F		0.18	0.02		0.0781886		18.1458	0.475155	15.3039	0.295535	37.1078	0.875051		0.0162		8384.65	0.752895	18.2649	0.0438251	27.1012	0.0509874	4.92546	0.0187799	0.269651
z5	337.122	0.200152	337.485	0.346937	339.99	1.92642		0.104541	80.8374	0.259983	310.934		20613.1	0.0536876	0.0609367	0.394272	0.120829	0.0532863	0.0788547	0.752124		Phoenix		D	F		0.18	0.02		0.0692666		18.1458	0.475155	15.3039	0.295535	37.1078	0.875051		0.0162		8498.47	0.601388	18.2612	0.034348	27.165	0.0380534	4.92201	0.0169227	0.269566
z6	337.207	0.219472	337.676	1.09749	340.907	8.2019		0.105013	80.8908	1.71673	47.1192		3138.63	0.0537016	0.0668023	0.394534	0.382047	0.0533079	0.360854	0.375913		Phoenix		D	F		0.18	0.02		0.0835838		18.1458	0.475155	15.3039	0.295535	37.1078	0.875051		0.0162		2578.62	0.650797	17.0609	0.0521398	21.3826	0.0626442	4.94873	0.0271248	0.290219
z7	337.119	0.184613	337.495	0.346554	340.086	2.00759		0.104418	80.8148	0.274513	294.393		19518.1	0.0536872	0.0562063	0.394286	0.120693	0.0532886	0.082711	0.727151		Phoenix		D	F		0.18	0.02		0.0657862		18.1458	0.475155	15.3039	0.295535	37.1078	0.875051		0.0162		8301.27	0.596244	18.2472	0.0367394	27.1205	0.0373296	4.92105	0.0136596	0.269716
z8	337.344	0.224636	337.463	0.381404	338.279	2.31319		0.104604	80.9095	0.260402	310.71		20598.6	0.053724	0.068347	0.394241	0.132841	0.0532461	0.097003	0.65474		Phoenix		D	F		0.18	0.02		0.0870427		18.1458	0.475155	15.3039	0.295535	37.1078	0.875051		0.0162		8502.01	0.945866	18.274	0.0632178	27.152	0.0681786	4.9265	0.034564	0.269612
z9	337.12	0.207288	337.478	0.357136	339.947	2.08973		0.104171	80.8472	0.259019	312.129		20694.5	0.0536874	0.0631097	0.394263	0.124383	0.0532853	0.0865852	0.696692		Phoenix		D	F		0.18	0.02		0.0784236		18.1458	0.475155	15.3039	0.295535	37.1078	0.875051		0.0162		8516.78	0.881816	18.2615	0.0389807	27.2511	0.0529777	4.92313	0.0221672	0.269607
z10	337.29	0.209681	337.562	0.362508	339.441	2.02767		0.104424	80.8664	0.242802	333.054		22079.3	0.0537151	0.0638069	0.394378	0.126228	0.0532734	0.0836498	0.744222		Phoenix		D	F		0.18	0.02		0.0738712		18.1458	0.475155	15.3039	0.295535	37.1078	0.875051		0.0162		8732.13	0.806684	18.2799	0.0444579	27.272	0.0475119	4.92372	0.0240014	0.269367
Lab 16
z02	337.1	0.25594	337.073	0.478555	336.885	3.09864		0.104432	80.9637	0.361228	224.135		15221.1	0.0536841	0.0779265	0.393706	0.16684	0.0532131	0.13288	0.584707		Phoenix		D	F		0.1467	0.0284		0.0791597		18.82	0.37	15.52	0.315	37.93	0.8		0.01623		7432.2	1.22957	18.192	0.0826624	26.6803	0.100126	4.92447	0.0438272	0.270698
z03	336.967	0.224523	337.355	0.478653	340.032	2.75652		0.10456	79.8211	0.331311	240.925		16358.2	0.0536623	0.0683872	0.394093	0.166757	0.0532871	0.117351	0.774555		Phoenix		D	F		0.1467	0.0284		0.0693457		18.82	0.37	15.52	0.315	37.93	0.8		0.01601		7707.83	1.03783	18.1893	0.0568094	26.7717	0.0766607	4.92075	0.0258423	0.270534
z05	336.908	0.240647	337.299	0.491805	339.993	2.961		0.104678	78.9951	0.374768	210.784		14313.6	0.0536526	0.0733108	0.394016	0.171363	0.0532862	0.126693	0.702132		Phoenix		D	F		0.1467	0.0284		0.0735733		18.82	0.37	15.52	0.315	37.93	0.8		0.01584		7208.74	1.00695	18.1479	0.0613526	26.5154	0.0735181	4.92273	0.0312149	0.271259
z06	337.12	0.250098	337.466	0.500548	339.851	3.01152		0.104474	80.1716	0.381259	210.281		14280.4	0.0536873	0.0761433	0.394245	0.174337	0.0532829	0.128991	0.697014		Phoenix		D	F		0.1467	0.0284		0.0725433		18.82	0.37	15.52	0.315	37.93	0.8		0.01607		7223.24	1.34167	18.1484	0.0650828	26.557	0.0776231	4.92487	0.0378204	0.27137
z07	337.064	0.247666	336.927	0.482939	335.983	2.64453		0.104163	79.342	0.309754	256.145		17394	0.0536781	0.0754152	0.393505	0.16843	0.053192	0.112126	0.80446		Phoenix		D	F		0.1467	0.0284		0.0738192		18.82	0.37	15.52	0.315	37.93	0.8		0.01591		7891.33	1.24179	18.2339	0.0539763	26.953	0.0635971	4.92263	0.0314682	0.269909
z08	336.877	0.23725	337.33	0.534649	340.456	3.15714		0.104622	80.5098	0.336317	239.387		16253.4	0.0536476	0.0722826	0.394059	0.186277	0.0532971	0.135626	0.760591		Phoenix		D	F		0.1467	0.0284		0.0895219		18.82	0.37	15.52	0.315	37.93	0.8		0.01614		7605.06	1.2026	18.1843	0.072851	26.7611	0.0823385	4.92313	0.0317451	0.27074
z09	337.187	0.260579	337.557	0.477279	340.105	2.7802		0.10477	77.4356	0.249837	309.944		21037.7	0.0536983	0.0793189	0.39437	0.166194	0.0532888	0.118437	0.714493		Phoenix		D	F		0.1467	0.0284		0.0798399		18.82	0.37	15.52	0.315	37.93	0.8		0.01552		8618.32	1.41547	18.2543	0.0766568	27.0913	0.0862526	4.92284	0.0330278	0.269686
z10	336.93	0.225313	337.548	0.452632	341.802	2.53945		0.104646	81.5821	0.273774	297.991		20227.1	0.0536563	0.0686351	0.394358	0.157615	0.0533288	0.107412	0.784293		Phoenix		D	F		0.1467	0.0284		0.0757361		18.82	0.37	15.52	0.315	37.93	0.8		0.01636		8451.11	1.02572	18.2315	0.0534323	27.0663	0.0703617	4.92032	0.0270462	0.269882
z11	337.011	0.292725	337.261	0.561784	338.985	2.86664		0.104488	81.9143	0.316578	258.749		17567.8	0.0536695	0.0891495	0.393964	0.195765	0.0532625	0.122364	0.866682		Phoenix		D	F		0.1467	0.0284		0.0662956		18.82	0.37	15.52	0.315	37.93	0.8		0.01643		7981.5	1.48039	18.2175	0.0580011	26.9001	0.0738073	4.92053	0.0342057	0.270101
z12	336.82	0.238364	336.813	0.519788	336.761	3.04201		0.103977	81.0358	0.474391	170.821		11606.6	0.0536383	0.0726339	0.393349	0.181334	0.0532102	0.130303	0.764239		Phoenix		D	F		0.1467	0.0284		0.0743061		18.82	0.37	15.52	0.315	37.93	0.8		0.01626		6449.2	0.993513	18.0952	0.0453309	26.2463	0.0633833	4.92233	0.0287413	0.272026
z13	337.081	0.243372	337.135	0.458034	337.504	2.61852		0.104454	80.6434	0.268089	300.808		20421.2	0.053681	0.074104	0.393791	0.159661	0.0532277	0.110963	0.744753		Phoenix		D	F		0.1467	0.0284		0.0636768		18.82	0.37	15.52	0.315	37.93	0.8		0.01617		8495.04	1.05912	18.2675	0.059971	27.1241	0.0774899	4.92155	0.0324237	0.269419
z14	336.996	0.248169	337.241	0.448357	338.93	2.36862		0.104532	80.1644	0.252151	317.922		21580.8	0.053667	0.0755833	0.393936	0.156247	0.0532612	0.099448	0.812419		Phoenix		D	F		0.1467	0.0284		0.086608		18.82	0.37	15.52	0.315	37.93	0.8		0.01607		8669.28	0.987794	18.269	0.0525992	27.1781	0.0699543	4.92225	0.0271624	0.269433
z15	337.078	0.241596	337.562	0.478978	340.901	2.59989		0.104821	81.9549	0.34189	239.711		16274.3	0.0536804	0.073564	0.394378	0.166784	0.0533076	0.110178	0.816756		Phoenix		D	F		0.1467	0.0284		0.0790349		18.82	0.37	15.52	0.315	37.93	0.8		0.01643		7691.86	0.9717	18.1811	0.0460858	26.7051	0.0495027	4.9227	0.0221394	0.270762
	a Isotopic dates calculated using λ238 = 1.55125E-10 (Jaffey et al. 1971) and λ235 = 9.8485E-10 (Jaffey et al. 1971).																							F - Faraday
	b Th contents calculated from radiogenic 208Pb and 230Th-corrected 206Pb/238U date of the sample, assuming concordance between U-Pb Th-Pb systems.																							D - Daly
	c Total mass of radiogenic Pb.																							S - SEM
	d Total mass of common Pb.
	e Ratio of radiogenic Pb (including 208Pb) to common Pb.
	f Measured ratio corrected for fractionation and spike contribution only.
	g Measured ratios corrected for fractionation, tracer and blank.
	h Assumed based on SRM 981 or ET2535 data (see Table 1).
	i Calculated.
[truncated: 18 more columns]

## Sheet: Models
																																		7/6 ratio to age deviation						2.405e-05
		Pb Models				Fractionation model																												t (Ma)	369.818	370.821	371.823	372.825	373.826	374.826	375.826	376.825	377.824	378.822	379.82
					%perAMU	-0.1	-0.08	-0.06	-0.04	-0.02	0	0.02	0.04	0.06	0.08	0.1	-0.01	0.01	-0.07															207/206	0.0539948	0.0540188	0.0540429	0.0540669	0.054091	0.054115	0.0541391	0.0541631	0.0541871	0.0542112	0.0542352
					206Pb/205Pb	4.92253	4.92352	4.9245	4.92549	4.92648	4.92746	4.92845	4.92943	4.93042	4.9314	4.93239	4.92697	4.92795	4.92401															7/6 age calc	0.0539947	0.0540188	0.0540428	0.0540669	0.0540909	0.054115	0.0541391	0.0541631	0.0541872	0.0542112	0.0542353
					207Pb/206Pb	0.0540589	0.0540697	0.0540805	0.0540914	0.0541022	0.054113	0.0541238	0.0541346	0.0541455	0.0541563	0.0541671	0.0541076	0.0541184	0.0540751															delta	-5.00873	-4.00573	-3.00337	-2.00162	-1.0005	0	0.999884	1.99915	2.99779	3.99581	4.99322
																																		206/205	4.934	4.934	4.934	4.934	4.934	4.934	4.934	4.934	4.934	4.934	4.934
						Deadtime models
					DT (ns)	34.8	35.05	35.3	35.55	35.8																								6/5 ratio to age deviation		0.002	0.002	0.002	0.002	0.002	0.002	0.002	0.002	0.002	0.002	0.002	0.002
					relative DT(ns)	-0.5	-0.25	0	0.25	0.5																								206/205	4.9144	4.9164	4.9184	4.9204	4.9224	4.9244	4.9264	4.9284	4.9304	4.9324	4.9344	4.9364	4.9384	4.9404
		avg 205 cps	203066	synthetic	1-DT*205m	1.0001	1.00005	1	0.999949	0.999898																								frac diff	-0.00243586	-0.00202988	-0.0016239	-0.00121793	-0.000811952	-0.000405976	0	0.000405976	0.000811952	0.00121793	0.0016239	0.00202988	0.00243586	0.00284183
		avg 206 cps	1000000	1M cps 206	1-DT*206m	1.0005	1.00025	1	0.99975	0.9995																								age	336.349	336.486	336.622	336.759	336.896	337.033	337.17	337.307	337.444	337.581	337.718	337.854	337.991	338.128
		avg 207 cps	54080.5		1-DT*207m	1.00003	1.00001	1	0.999986	0.999973																								delta age	-0.821297	-0.684415	-0.547532	-0.410649	-0.273766	-0.136883	0	0.136883	0.273766	0.410649	0.547532	0.684415	0.821297	0.95818
		206Pb/205Pb	4.9245		206Pb/205Pb (corr)	4.92254	4.92352	4.9245	4.92549	4.92647																								delta age target	-0.6	-0.5	-0.4	-0.3	-0.2	-0.1	0	0.1	0.2	0.3	0.4	0.5	0.6	0.7
		207Pb/206Pb	0.0540805		207Pb/206Pb (corr)	0.0541061	0.0540933	0.0540805	0.0540677	0.054055																								206/205 target	4.91763	4.91909	4.92056	4.92202	4.92348	4.92494	4.9264	4.92786	4.92932	4.93078	4.93224	4.93371	4.93517	4.93663
		avg 205 cps	101543	synthetic	1-DT*205m	1.00005	1.00003	1	0.999975	0.999949																								207/206	0.05424	0.05424	0.05424	0.05424	0.05424	0.05424	0.05424	0.05424	0.05424	0.05424	0.05424	0.05424	0.05424	0.05424
		avg 206 cps	500000	500K cps 206	1-DT*206m	1.00025	1.00012	1	0.999875	0.99975
		avg 207 cps	27037.6		1-DT*207m	1.00001	1.00001	1	0.999993	0.999986																								U ratio to age deviation		0.00025	0.00025	0.00025	0.00025	0.00025	0.00025	0.00025	0.00025	0.00025	0.00025	0.00025	0.00025
		206Pb/205Pb	4.92401		206Pb/205Pb (corr)	4.92303	4.92352	4.92401	4.9245	4.92499																								238/235	1.9911	1.99135	1.9916	1.99185	1.9921	1.99235	1.9926	1.99285	1.9931	1.99335	1.9936	1.99385	1.9941	1.99435
		207Pb/206Pb	0.0540751		207Pb/206Pb (corr)	0.0540879	0.0540815	0.0540751	0.0540687	0.0540623																								frac diff	-0.000752785	-0.000627321	-0.000501857	-0.000376393	-0.000250928	-0.000125464	0	0.000125464	0.000250928	0.000376393	0.000501857	0.000627321	0.000752785	0.00087825
		avg 205 cps	50776.7	synthetic	1-DT*205m	1.00003	1.00001	1	0.999987	0.999975																								age	336.916	336.958	337.001	337.043	337.085	337.128	337.17	337.212	337.255	337.297	337.339	337.382	337.424	337.466
		avg 206 cps	250000	250K cps 206	1-DT*206m	1.00012	1.00006	1	0.999938	0.999875																								delta age	0.253817	0.211514	0.169211	0.126908	0.0846055	0.0423028	0	-0.0423028	-0.0846055	-0.126908	-0.169211	-0.211514	-0.253817	-0.296119
		avg 207 cps	13517.4		1-DT*207m	1.00001	1	1	0.999997	0.999993																								delta age target	0.6	0.5	0.4	0.3	0.2	0.1	0	-0.1	-0.2	-0.3	-0.4	-0.5	-0.6	-0.7
		206Pb/205Pb	4.92352		206Pb/205Pb (corr)	4.92303	4.92327	4.92352	4.92376	4.92401																								238/235 target	1.98905	1.98965	1.99024	1.99083	1.99142	1.99201	1.9926	1.99319	1.99378	1.99437	1.99496	1.99555	1.99615	1.99674
		207Pb/206Pb	0.0540697		207Pb/206Pb (corr)	0.0540761	0.0540729	0.0540697	0.0540665	0.0540633																								233/235	0.9595	0.9595	0.9595	0.9595	0.9595	0.9595	0.9595	0.9595	0.9595	0.9595	0.9595	0.9595	0.9595	0.9595
						Faraday bias (gain/efficiency/baseline) model
					ppm	-200	-100	0	0	0	100	200
				207Pb cup	207Pb/206Pb	0.0541455	0.0541509	0.0541563	0.0541563	0.0541563	0.0541617	0.0541671
					206Pb/205Pb	4.9314	4.9314	4.9314	4.9314	4.9314	4.9314	4.9314
				206Pb cup	207Pb/206Pb	0.0541671	0.0541617	0.0541563	0.0541563	0.0541563	0.0541509	0.0541455
					206Pb/205Pb	4.93042	4.93091	4.9314	4.9314	4.9314	4.9319	4.93239
				205Pb cup	207Pb/206Pb	0.0541563	0.0541563	0.0541563	0.0541563	0.0541563	0.0541563	0.0541563
					206Pb/205Pb	4.93239	4.9319	4.9314	4.9314	4.9314	4.93091	4.93042
						Interference model
					cps	0	10	20	50
				(constant excess over baseline)	avg 205 cps	101472	101482	101492	101522
					avg 206 cps	500000	500010	500020	500050
					avg 207 cps	27056.5	27066.5	27076.5	27106.5
					206Pb/205Pb	4.92746	4.92707	4.92669	4.92553
					207Pb/206Pb	0.054113	0.0541319	0.0541508	0.0542076
				(2:1 odd/even excess over baseline)	avg 205 cps	101472	101482	101492	101522
					avg 206 cps	500000	500005	500010	500025
					avg 207 cps	27056.5	27066.5	27076.5	27106.5
					206Pb/205Pb	4.92746	4.92702	4.92659	4.92528
					207Pb/206Pb	0.054113	0.0541325	0.0541519	0.0542103
						Common Pb subtraction model (effect < symbol size)
					206Pb/205Pb	4.92194	4.92192
					207Pb/206Pb	0.0532327	0.0532313
						z3 B	z3 B
						all blank	all initial
		U Models				Fractionation model
					%perAMU	-0.03	-0.02	-0.01	0	0.01	0.02	0.03	0.005	-0.0175	-0.0025	0.015			no oxide
					238U/235U	1.99097	1.99156	1.99216	1.99276	1.99336	1.99395	1.99455	1.99306	1.99171	1.99261	1.99366		238U/235U	1.98581
					233U/235U	0.959379	0.959188	0.958996	0.958804	0.958612	0.958421	0.958229	0.958708	0.95914	0.958852	0.958516		233U/235U	0.954746
						Deadtime models
					DT (ns)	29.58	30.08	30.58	31.08	31.58
					relative DT(ns)	-1	-0.5	0	0.5	1
		avg 233 cps	958516	synthetic	1-DT*205m	1.00096	1.00048	1	0.999521	0.999041
		avg 235 cps	1000000	1M cps 235	1-DT*206m	1.001	1.0005	1	0.9995	0.999
		avg 238 cps	1.99366e+06		1-DT*207m	1.00199	1.001	1	0.999003	0.998006
		238U/235U	1.99366		238U/235U (corr)	1.99563	1.99465	1.99366	1.99266	1.99167
		233U/235U	0.958516		233U/235U (corr)	0.958477	0.958497	0.958516	0.958536	0.958556
		avg 233 cps	479426	synthetic	1-DT*205m	1.00048	1.00024	1	0.99976	0.999521
		avg 235 cps	500000	500K cps 235	1-DT*206m	1.0005	1.00025	1	0.99975	0.9995
		avg 238 cps	996305		1-DT*207m	1.001	1.0005	1	0.999502	0.999004
		238U/235U	1.99261		238U/235U (corr)	1.9936	1.9931	1.99261	1.99211	1.99162
		233U/235U	0.958852		233U/235U (corr)	0.958832	0.958842	0.958852	0.958862	0.958872
		avg 233 cps	239749	synthetic	1-DT*205m	1.00024	1.00012	1	0.99988	0.99976
		avg 235 cps	250000	250K cps 235	1-DT*206m	1.00025	1.00012	1	0.999875	0.99975
		avg 238 cps	498040		1-DT*207m	1.0005	1.00025	1	0.999751	0.999502
		238U/235U	1.99216		238U/235U (corr)	1.99266	1.99241	1.99216	1.99191	1.99167
		233U/235U	0.958996		233U/235U (corr)	0.958986	0.958991	0.958996	0.959001	0.959006
						Oxide correction model
					18O/16O	0.00204	0.00205	0.00206
					238U/235U	1.99358	1.99362	1.99366
					233U/235U	0.95848	0.958498	0.958516
						Faraday bias (gain/efficiency/baseline) model
					ppm	-200	-100	0	0	0	100	200
				238U cup	238U/235U	1.99131	1.99151	1.99171	1.99171	1.99171	1.99191	1.99211
					233U/235U	0.95914	0.95914	0.95914	0.95914	0.95914	0.95914	0.95914
				235U cup	238U/235U	1.99211	1.99191	1.99171	1.99171	1.99171	1.99151	1.99131
					233U/235U	0.959332	0.959236	0.95914	0.95914	0.95914	0.959044	0.958948
				233U cup	238U/235U	1.99171	1.99171	1.99171	1.99171	1.99171	1.99171	1.99171
					233U/235U	0.958948	0.959044	0.95914	0.95914	0.95914	0.959236	0.959332
					100% natural U	Blank correction model [ + overcorrection / - undercorrection]							50% natural + 50% spike	Blank correction model [ + overcorrection / - undercorrection]							100% spike U	Blank correction model [ + overcorrection / - undercorrection]
					U blank [pg]	-0.5	-0.25	0	0.25	0.5			U blank [pg]	-0.5	-0.25	0	0.25	0.5			U blank [pg]	-0.5	-0.25	0	0.25	0.5
					(238U/233U)meas	2.07812	2.07812	2.07812	2.07812	2.07812			(238U/233U)meas	2.07812	2.07812	2.07812	2.07812	2.07812			(238U/233U)meas	2.07812	2.07812	2.07812	2.07812	2.07812
					(233U/235U)meas	0.958852	0.958852	0.958852	0.958852	0.958852			(233U/235U)meas	0.958852	0.958852	0.958852	0.958852	0.958852			(233U/235U)meas	0.958852	0.958852	0.958852	0.958852	0.958852
					U blank AW	238.029	238.029	238.029	238.029	238.029			U blank AW	237.832	237.832	237.832	237.832	237.832			U blank AW	237.832	237.832	237.832	237.832	237.832
					U238b [mol]	-2.08535e-15	-1.04267e-15	0	1.04267e-15	2.08535e-15			U238b [mol]	-1.04536e-15	-5.22681e-16	0	5.22681e-16	1.04536e-15			U238b [mol]	-3.6471e-18	-1.82355e-18	0	1.82355e-18	3.6471e-18
					U235b [mol]	-1.51312e-17	-7.56559e-18	0	7.56559e-18	1.51312e-17			U235b [mol]	-5.48547e-16	-2.74273e-16	0	2.74273e-16	5.48547e-16			U235b [mol]	-1.08185e-15	-5.40923e-16	0	5.40923e-16	1.08185e-15
													U233b [mol]	-5.25343e-16	-2.62672e-16	0	2.62672e-16	5.25343e-16			U233b [mol]	-1.05069e-15	-5.25343e-16	0	5.25343e-16	1.05069e-15
					U233t [mol/g]	1.9929e-10	1.9929e-10	1.9929e-10	1.9929e-10	1.9929e-10			U233t [mol/g]	1.9929e-10	1.9929e-10	1.9929e-10	1.9929e-10	1.9929e-10			U233t [mol/g]	1.9929e-10	1.9929e-10	1.9929e-10	1.9929e-10	1.9929e-10
					U233t [mol]	3.09936e-12	3.09936e-12	3.09936e-12	3.09936e-12	3.09936e-12			U233t [mol]	3.09936e-12	3.09936e-12	3.09936e-12	3.09936e-12	3.09936e-12			U233t [mol]	3.09936e-12	3.09936e-12	3.09936e-12	3.09936e-12	3.09936e-12
													U spike AW	234.063	234.063	234.063	234.063	234.063			U spike AW	234.063	234.063	234.063	234.063	234.063
					(U238/U235)corr	1.99325	1.99293	1.99261	1.99229	1.99197			(U238/U235)corr	1.99259	1.9926	1.99261	1.99262	1.99262			(U238/U235)corr	1.99194	1.99228	1.99261	1.99294	1.99328
					(233U/235U)corr	0.958848	0.95885	0.958852	0.958854	0.958857			(233U/235U)corr	0.958852	0.958852	0.958852	0.958852	0.958852			(233U/235U)corr	0.958856	0.958854	0.958852	0.95885	0.958848
Error Ellipses	Lab 4 (Isoprobe-T data)									Lab 4 (Phoenix data)									meas	fc-bc	ds synthetic
Sample	PLES535	PLES535	PLES535	PLES535	PLES535	PLES535	PLES535	PLES535	PLES535	PLES535	PLES535	PLES535	PLES535	PLES535	PLES535	PLES535	PLES535	PLES535	PLES535	PLES535	PLES535
Fraction ID	z1 A	z2 A	z3 A	z4 A	z1 B	z2 B	z3 B	z4 B	z5 B	z6 A	z7 A	z8 A	z9 A	z10 A	z6 B	z7 B	z8 B	z9 B	z8 B	z8 B	z8 B
206Pb/205Pb	4.93013	4.92857	4.92883	4.9291	4.92897	4.92716	4.92753	4.92746	4.92733	4.92926	4.92836	4.93259	4.92908	4.92812	4.9276	4.92981	4.9273	4.92588	4.92746	4.92746	4.92746
207Pb/206Pb	0.0540984	0.0541466	0.0541296	0.0541149	0.0541117	0.0541012	0.0541165	0.0541126	0.0540615	0.0541552	0.0541195	0.0541989	0.0541838	0.0541819	0.0541526	0.0541503	0.0541494	0.0541821	0.0541126	0.0541126	0.0541126
var 6/5	2.31836e-06	2.31e-06	2.2342e-06	2.24989e-06	2.26019e-06	2.47666e-06	2.24349e-06	2.24673e-06	2.32017e-06	3.38924e-06	3.36375e-06	3.44223e-06	3.37503e-06	3.39145e-06	3.43803e-06	3.39234e-06	3.37591e-06	3.41128e-06	6.15653e-08	3.37591e-06	2.62596e-07
var 7/6	1.41168e-09	1.46852e-09	1.40825e-09	1.3987e-09	1.39802e-09	1.67219e-09	1.36856e-09	1.37564e-09	1.39802e-09	2.08404e-09	2.05027e-09	2.09477e-09	2.06827e-09	2.06508e-09	2.09588e-09	2.08792e-09	2.06495e-09	2.09173e-09	3.54982e-11	2.06495e-09	1.75991e-10
cov 6/5-7/6	-2.54394e-08	-2.53783e-08	-2.45366e-08	-2.47007e-08	-2.4813e-08	-2.71942e-08	-2.46391e-08	-2.46732e-08	-2.54564e-08	-3.72358e-08	-3.69382e-08	-3.78229e-08	-3.71007e-08	-3.72871e-08	-3.77828e-08	-3.72624e-08	-3.71001e-08	-3.75223e-08	-2.93394e-10	-3.71001e-08	-2.88584e-09
conf. int.	0.95	0.95	0.95	0.95	0.95	0.95	0.95	0.95	0.95	0.95	0.95	0.95	0.95	0.95	0.95	0.95	0.95	0.95	0.95	0.95	0.95
chi-sq	5.99146	5.99146	5.99146	5.99146	5.99146	5.99146	5.99146	5.99146	5.99146	5.99146	5.99146	5.99146	5.99146	5.99146	5.99146	5.99146	5.99146	5.99146	5.99146	5.99146	5.99146
trace	2.31977e-06	2.31147e-06	2.23561e-06	2.25128e-06	2.26159e-06	2.47833e-06	2.24486e-06	2.2481e-06	2.32157e-06	3.39132e-06	3.3658e-06	3.44433e-06	3.3771e-06	3.39352e-06	3.44013e-06	3.39443e-06	3.37797e-06	3.41337e-06	6.16008e-08	3.37797e-06	2.62772e-07
det	2.62562e-15	2.74824e-15	2.54428e-15	2.53678e-15	2.5441e-15	3.40193e-15	2.46327e-15	2.48192e-15	2.59561e-15	5.67681e-15	5.53218e-15	5.78011e-15	5.604e-15	5.61329e-15	5.77816e-15	5.69444e-15	5.59465e-15	5.72753e-15	2.09937e-18	5.59465e-15	3.78865e-17
eig1	2.31864e-06	2.31028e-06	2.23447e-06	2.25016e-06	2.26046e-06	2.47696e-06	2.24376e-06	2.247e-06	2.32045e-06	3.38965e-06	3.36416e-06	3.44265e-06	3.37544e-06	3.39186e-06	3.43845e-06	3.39275e-06	3.37631e-06	3.41169e-06	6.15667e-08	3.37631e-06	2.62627e-07
eig2	1.1324e-09	1.18957e-09	1.13865e-09	1.12738e-09	1.12548e-09	1.37343e-09	1.09783e-09	1.10455e-09	1.11858e-09	1.67475e-09	1.64445e-09	1.67897e-09	1.66023e-09	1.65493e-09	1.68046e-09	1.67841e-09	1.65703e-09	1.6788e-09	3.40992e-11	1.65703e-09	1.4426e-10
axis a	0.0037272	0.00372048	0.00365893	0.00367175	0.00368015	0.00385235	0.00366652	0.00366917	0.00372866	0.00450655	0.00448957	0.00454164	0.00449709	0.00450802	0.00453887	0.00450861	0.00449767	0.00452118	0.00060735	0.00449767	0.0012544
axis b	8.23693e-05	8.4423e-05	8.25965e-05	8.21867e-05	8.21174e-05	9.0713e-05	8.11025e-05	8.13503e-05	8.18654e-05	0.000100171	9.92605e-05	0.000100297	9.97357e-05	9.95763e-05	0.000100341	0.00010028	9.96395e-05	0.000100292	1.42935e-05	9.96395e-05	2.93994e-05
θ (rad)	3.13061	3.1306	3.13061	3.13061	3.13061	3.13061	3.13061	3.13061	3.13062	3.1306	3.13061	3.1306	3.1306	3.13059	3.1306	3.1306	3.1306	3.13059	3.13682	3.1306	3.1306
θ (deg)	179.371	179.37	179.37	179.371	179.371	179.371	179.37	179.371	179.371	179.37	179.371	179.37	179.37	179.37	179.37	179.37	179.37	179.369	179.727	179.37	179.37
Q 11	-0.99994	-0.99994	-0.99994	-0.99994	-0.99994	-0.99994	-0.99994	-0.99994	-0.99994	-0.99994	-0.99994	-0.99994	-0.99994	-0.99994	-0.99994	-0.99994	-0.99994	-0.999939	-0.999989	-0.99994	-0.99994
Q12	-0.0109777	-0.0109913	-0.0109872	-0.0109835	-0.0109831	-0.0109856	-0.0109872	-0.0109866	-0.0109764	-0.0109912	-0.010986	-0.0109926	-0.0109974	-0.0109991	-0.0109944	-0.010989	-0.0109944	-0.0110042	-0.00476816	-0.0109944	-0.0109951
Q21	0.0109777	0.0109913	0.0109872	0.0109835	0.0109831	0.0109856	0.0109872	0.0109866	0.0109764	0.0109912	0.010986	0.0109926	0.0109974	0.0109991	0.0109944	0.010989	0.0109944	0.0110042	0.00476816	0.0109944	0.0109951
Q22	-0.99994	-0.99994	-0.99994	-0.99994	-0.99994	-0.99994	-0.99994	-0.99994	-0.99994	-0.99994	-0.99994	-0.99994	-0.99994	-0.99994	-0.99994	-0.99994	-0.99994	-0.999939	-0.999989	-0.99994	-0.99994
e0	0	0	0	0	0	0	0	0	0	0	0	0	0	0	0	0	0	0	0	0	0
e1	0.20944	0.20944	0.20944	0.20944	0.20944	0.20944	0.20944	0.20944	0.20944	0.20944	0.20944	0.20944	0.20944	0.20944	0.20944	0.20944	0.20944	0.20944	0.20944	0.20944	0.20944
e2	0.418879	0.418879	0.418879	0.418879	0.418879	0.418879	0.418879	0.418879	0.418879	0.418879	0.418879	0.418879	0.418879	0.418879	0.418879	0.418879	0.418879	0.418879	0.418879	0.418879	0.418879
e3	0.628319	0.628319	0.628319	0.628319	0.628319	0.628319	0.628319	0.628319	0.628319	0.628319	0.628319	0.628319	0.628319	0.628319	0.628319	0.628319	0.628319	0.628319	0.628319	0.628319	0.628319
e4	0.837758	0.837758	0.837758	0.837758	0.837758	0.837758	0.837758	0.837758	0.837758	0.837758	0.837758	0.837758	0.837758	0.837758	0.837758	0.837758	0.837758	0.837758	0.837758	0.837758	0.837758
e5	1.0472	1.0472	1.0472	1.0472	1.0472	1.0472	1.0472	1.0472	1.0472	1.0472	1.0472	1.0472	1.0472	1.0472	1.0472	1.0472	1.0472	1.0472	1.0472	1.0472	1.0472
e6	1.25664	1.25664	1.25664	1.25664	1.25664	1.25664	1.25664	1.25664	1.25664	1.25664	1.25664	1.25664	1.25664	1.25664	1.25664	1.25664	1.25664	1.25664	1.25664	1.25664	1.25664
e7	1.46608	1.46608	1.46608	1.46608	1.46608	1.46608	1.46608	1.46608	1.46608	1.46608	1.46608	1.46608	1.46608	1.46608	1.46608	1.46608	1.46608	1.46608	1.46608	1.46608	1.46608
e8	1.67552	1.67552	1.67552	1.67552	1.67552	1.67552	1.67552	1.67552	1.67552	1.67552	1.67552	1.67552	1.67552	1.67552	1.67552	1.67552	1.67552	1.67552	1.67552	1.67552	1.67552
e9	1.88496	1.88496	1.88496	1.88496	1.88496	1.88496	1.88496	1.88496	1.88496	1.88496	1.88496	1.88496	1.88496	1.88496	1.88496	1.88496	1.88496	1.88496	1.88496	1.88496	1.88496
e10	2.0944	2.0944	2.0944	2.0944	2.0944	2.0944	2.0944	2.0944	2.0944	2.0944	2.0944	2.0944	2.0944	2.0944	2.0944	2.0944	2.0944	2.0944	2.0944	2.0944	2.0944
e11	2.30383	2.30383	2.30383	2.30383	2.30383	2.30383	2.30383	2.30383	2.30383	2.30383	2.30383	2.30383	2.30383	2.30383	2.30383	2.30383	2.30383	2.30383	2.30383	2.30383	2.30383
e12	2.51327	2.51327	2.51327	2.51327	2.51327	2.51327	2.51327	2.51327	2.51327	2.51327	2.51327	2.51327	2.51327	2.51327	2.51327	2.51327	2.51327	2.51327	2.51327	2.51327	2.51327
e13	2.72271	2.72271	2.72271	2.72271	2.72271	2.72271	2.72271	2.72271	2.72271	2.72271	2.72271	2.72271	2.72271	2.72271	2.72271	2.72271	2.72271	2.72271	2.72271	2.72271	2.72271
e14	2.93215	2.93215	2.93215	2.93215	2.93215	2.93215	2.93215	2.93215	2.93215	2.93215	2.93215	2.93215	2.93215	2.93215	2.93215	2.93215	2.93215	2.93215	2.93215	2.93215	2.93215
e15	3.14159	3.14159	3.14159	3.14159	3.14159	3.14159	3.14159	3.14159	3.14159	3.14159	3.14159	3.14159	3.14159	3.14159	3.14159	3.14159	3.14159	3.14159	3.14159	3.14159	3.14159
e16	3.35103	3.35103	3.35103	3.35103	3.35103	3.35103	3.35103	3.35103	3.35103	3.35103	3.35103	3.35103	3.35103	3.35103	3.35103	3.35103	3.35103	3.35103	3.35103	3.35103	3.35103
e17	3.56047	3.56047	3.56047	3.56047	3.56047	3.56047	3.56047	3.56047	3.56047	3.56047	3.56047	3.56047	3.56047	3.56047	3.56047	3.56047	3.56047	3.56047	3.56047	3.56047	3.56047
e18	3.76991	3.76991	3.76991	3.76991	3.76991	3.76991	3.76991	3.76991	3.76991	3.76991	3.76991	3.76991	3.76991	3.76991	3.76991	3.76991	3.76991	3.76991	3.76991	3.76991	3.76991
e19	3.97935	3.97935	3.97935	3.97935	3.97935	3.97935	3.97935	3.97935	3.97935	3.97935	3.97935	3.97935	3.97935	3.97935	3.97935	3.97935	3.97935	3.97935	3.97935	3.97935	3.97935
e20	4.18879	4.18879	4.18879	4.18879	4.18879	4.18879	4.18879	4.18879	4.18879	4.18879	4.18879	4.18879	4.18879	4.18879	4.18879	4.18879	4.18879	4.18879	4.18879	4.18879	4.18879
e21	4.39823	4.39823	4.39823	4.39823	4.39823	4.39823	4.39823	4.39823	4.39823	4.39823	4.39823	4.39823	4.39823	4.39823	4.39823	4.39823	4.39823	4.39823	4.39823	4.39823	4.39823
e22	4.60767	4.60767	4.60767	4.60767	4.60767	4.60767	4.60767	4.60767	4.60767	4.60767	4.60767	4.60767	4.60767	4.60767	4.60767	4.60767	4.60767	4.60767	4.60767	4.60767	4.60767
e23	4.81711	4.81711	4.81711	4.81711	4.81711	4.81711	4.81711	4.81711	4.81711	4.81711	4.81711	4.81711	4.81711	4.81711	4.81711	4.81711	4.81711	4.81711	4.81711	4.81711	4.81711
e24	5.02655	5.02655	5.02655	5.02655	5.02655	5.02655	5.02655	5.02655	5.02655	5.02655	5.02655	5.02655	5.02655	5.02655	5.02655	5.02655	5.02655	5.02655	5.02655	5.02655	5.02655
e25	5.23599	5.23599	5.23599	5.23599	5.23599	5.23599	5.23599	5.23599	5.23599	5.23599	5.23599	5.23599	5.23599	5.23599	5.23599	5.23599	5.23599	5.23599	5.23599	5.23599	5.23599
e26	5.44543	5.44543	5.44543	5.44543	5.44543	5.44543	5.44543	5.44543	5.44543	5.44543	5.44543	5.44543	5.44543	5.44543	5.44543	5.44543	5.44543	5.44543	5.44543	5.44543	5.44543
e27	5.65487	5.65487	5.65487	5.65487	5.65487	5.65487	5.65487	5.65487	5.65487	5.65487	5.65487	5.65487	5.65487	5.65487	5.65487	5.65487	5.65487	5.65487	5.65487	5.65487	5.65487
e28	5.86431	5.86431	5.86431	5.86431	5.86431	5.86431	5.86431	5.86431	5.86431	5.86431	5.86431	5.86431	5.86431	5.86431	5.86431	5.86431	5.86431	5.86431	5.86431	5.86431	5.86431
e29	6.07375	6.07375	6.07375	6.07375	6.07375	6.07375	6.07375	6.07375	6.07375	6.07375	6.07375	6.07375	6.07375	6.07375	6.07375	6.07375	6.07375	6.07375	6.07375	6.07375	6.07375
e30	6.28319	6.28319	6.28319	6.28319	6.28319	6.28319	6.28319	6.28319	6.28319	6.28319	6.28319	6.28319	6.28319	6.28319	6.28319	6.28319	6.28319	6.28319	6.28319	6.28319	6.28319
x0	4.92641	4.92485	4.92517	4.92543	4.92529	4.92331	4.92386	4.92379	4.9236	4.92476	4.92387	4.92805	4.92458	4.92361	4.92306	4.9253	4.9228	4.92136	4.92685	4.92296	4.92621
x1	4.92649	4.92493	4.92525	4.92551	4.92537	4.92339	4.92394	4.92387	4.92368	4.92486	4.92396	4.92815	4.92468	4.92371	4.92316	4.9254	4.9229	4.92145	4.92687	4.92306	4.92623
x2	4.92673	4.92517	4.92549	4.92575	4.92561	4.92364	4.92418	4.92411	4.92392	4.92515	4.92425	4.92844	4.92497	4.924	4.92345	4.92569	4.92319	4.92175	4.92691	4.92335	4.92631
x3	4.92712	4.92556	4.92587	4.92613	4.92599	4.92404	4.92456	4.92449	4.92431	4.92562	4.92472	4.92892	4.92544	4.92447	4.92393	4.92616	4.92366	4.92222	4.92697	4.92382	4.92645
x4	4.92764	4.92608	4.92638	4.92665	4.9265	4.92458	4.92507	4.925	4.92483	4.92625	4.92535	4.92955	4.92607	4.9251	4.92456	4.9268	4.92429	4.92285	4.92705	4.92445	4.92662
x5	4.92827	4.9267	4.927	4.92727	4.92713	4.92523	4.92569	4.92563	4.92546	4.92701	4.92611	4.93032	4.92683	4.92586	4.92533	4.92756	4.92505	4.92362	4.92716	4.92521	4.92683
x6	4.92898	4.92742	4.9277	4.92797	4.92783	4.92597	4.92639	4.92633	4.92618	4.92787	4.92697	4.93119	4.92769	4.92672	4.9262	4.92842	4.92591	4.92448	4.92727	4.92607	4.92707
x7	4.92974	4.92818	4.92844	4.92872	4.92858	4.92676	4.92714	4.92708	4.92694	4.92879	4.92789	4.93212	4.92861	4.92765	4.92712	4.92934	4.92683	4.9254	4.9274	4.92699	4.92733
x8	4.93052	4.92895	4.92921	4.92949	4.92935	4.92756	4.92791	4.92784	4.92772	4.92973	4.92882	4.93307	4.92955	4.92859	4.92807	4.93028	4.92777	4.92635	4.92752	4.92793	4.92759
x9	4.93128	4.92971	4.92996	4.93024	4.9301	4.92835	4.92866	4.92859	4.92848	4.93066	4.92974	4.934	4.93046	4.92951	4.929	4.9312	4.92869	4.92727	4.92765	4.92885	4.92785
x10	4.932	4.93043	4.93066	4.93094	4.93081	4.92909	4.92936	4.92929	4.92919	4.93152	4.9306	4.93486	4.93132	4.93037	4.92987	4.93207	4.92955	4.92814	4.92776	4.92971	4.92809
x11	4.93263	4.93105	4.93128	4.93156	4.93143	4.92974	4.92998	4.92992	4.92982	4.93228	4.93136	4.93563	4.93208	4.93113	4.93064	4.93283	4.93031	4.9289	4.92787	4.93047	4.9283
x12	4.93315	4.93157	4.93179	4.93207	4.93194	4.93028	4.93049	4.93043	4.93034	4.93291	4.93199	4.93627	4.93271	4.93176	4.93127	4.93346	4.93094	4.92953	4.92795	4.9311	4.92848
x13	4.93354	4.93196	4.93217	4.93246	4.93233	4.93068	4.93087	4.93081	4.93073	4.93338	4.93246	4.93674	4.93318	4.93224	4.93175	4.93393	4.93141	4.93001	4.92802	4.93157	4.92861
x14	4.93378	4.9322	4.93241	4.9327	4.93257	4.93093	4.93111	4.93105	4.93097	4.93367	4.93275	4.93704	4.93347	4.93253	4.93204	4.93422	4.9317	4.9303	4.92805	4.93186	4.92869
x15	4.93386	4.93229	4.93249	4.93278	4.93265	4.93101	4.93119	4.93113	4.93106	4.93377	4.93284	4.93713	4.93357	4.93263	4.93214	4.93432	4.9318	4.9304	4.92807	4.93196	4.92871
x16	4.93378	4.9322	4.93241	4.9327	4.93257	4.93093	4.93111	4.93105	4.93098	4.93367	4.93275	4.93704	4.93348	4.93253	4.93204	4.93422	4.9317	4.9303	4.92805	4.93186	4.92869
x17	4.93354	4.93196	4.93217	4.93246	4.93233	4.93068	4.93088	4.93081	4.93073	4.93338	4.93246	4.93674	4.93318	4.93224	4.93175	4.93393	4.93141	4.93001	4.92802	4.93157	4.92861
x18	4.93315	4.93158	4.93179	4.93208	4.93195	4.93028	4.93049	4.93043	4.93034	4.93291	4.93199	4.93627	4.93272	4.93177	4.93127	4.93346	4.93094	4.92953	4.92795	4.9311	4.92848
x19	4.93263	4.93106	4.93128	4.93156	4.93143	4.92974	4.92998	4.92992	4.92982	4.93228	4.93136	4.93563	4.93209	4.93114	4.93064	4.93283	4.93031	4.9289	4.92787	4.93047	4.9283
x20	4.932	4.93043	4.93066	4.93094	4.93081	4.92909	4.92936	4.9293	4.92919	4.93152	4.9306	4.93487	4.93133	4.93037	4.92987	4.93207	4.92955	4.92814	4.92776	4.92971	4.92809
x21	4.93129	4.92972	4.92996	4.93024	4.93011	4.92835	4.92866	4.9286	4.92848	4.93066	4.92974	4.934	4.93047	4.92951	4.929	4.93121	4.92869	4.92727	4.92765	4.92885	4.92785
x22	4.93052	4.92896	4.92921	4.92949	4.92935	4.92756	4.92791	4.92785	4.92772	4.92974	4.92883	4.93307	4.92955	4.92859	4.92807	4.93029	4.92777	4.92635	4.92752	4.92793	4.92759
x23	4.92974	4.92818	4.92845	4.92872	4.92858	4.92676	4.92714	4.92708	4.92694	4.92879	4.92789	4.93212	4.92861	4.92765	4.92713	4.92934	4.92683	4.92541	4.9274	4.92699	4.92733
x24	4.92898	4.92742	4.9277	4.92797	4.92783	4.92597	4.92639	4.92633	4.92618	4.92787	4.92697	4.93119	4.92769	4.92673	4.9262	4.92842	4.92591	4.92448	4.92727	4.92607	4.92707
x25	4.92827	4.92671	4.927	4.92727	4.92713	4.92524	4.92569	4.92563	4.92546	4.92701	4.92611	4.93032	4.92683	4.92587	4.92533	4.92756	4.92505	4.92362	4.92716	4.92521	4.92683
x26	4.92764	4.92608	4.92638	4.92665	4.92651	4.92458	4.92507	4.92501	4.92483	4.92625	4.92535	4.92956	4.92607	4.9251	4.92456	4.9268	4.92429	4.92285	4.92705	4.92445	4.92662
x27	4.92712	4.92556	4.92587	4.92613	4.92599	4.92404	4.92456	4.92449	4.92431	4.92562	4.92472	4.92892	4.92544	4.92447	4.92393	4.92617	4.92366	4.92222	4.92697	4.92382	4.92645
x28	4.92673	4.92517	4.92549	4.92575	4.92561	4.92364	4.92418	4.92411	4.92392	4.92515	4.92425	4.92845	4.92497	4.924	4.92345	4.92569	4.92319	4.92175	4.92691	4.92335	4.92631
x29	4.92649	4.92493	4.92525	4.92551	4.92537	4.92339	4.92394	4.92387	4.92368	4.92486	4.92396	4.92815	4.92468	4.92371	4.92316	4.9254	4.9229	4.92145	4.92687	4.92306	4.92623
x30	4.92641	4.92485	4.92517	4.92543	4.92529	4.92331	4.92386	4.92379	4.9236	4.92476	4.92387	4.92805	4.92458	4.92361	4.92306	4.9253	4.9228	4.92136	4.92685	4.92296	4.92621
y0	0.0541394	0.0541875	0.0541698	0.0541552	0.0541521	0.0541435	0.0541568	0.0541529	0.0541025	0.0542048	0.0541688	0.0542488	0.0542332	0.0542315	0.0542025	0.0541999	0.0541989	0.0542319	0.0541154	0.054162	0.0541263
y1	0.0541213	0.054169	0.0541518	0.0541373	0.0541341	0.0541237	0.054139	0.0541351	0.0540845	0.0541829	0.0541471	0.0542269	0.0542114	0.0542097	0.0541805	0.054178	0.0541771	0.0542099	0.0541124	0.0541402	0.0541199
y2	0.0541023	0.0541496	0.0541328	0.0541183	0.0541152	0.0541029	0.0541203	0.0541163	0.0540656	0.0541597	0.0541242	0.0542037	0.0541884	0.0541867	0.0541573	0.0541548	0.0541541	0.0541868	0.0541094	0.0541172	0.0541132
y3	0.0540831	0.05413	0.0541136	0.0540992	0.0540961	0.0540821	0.0541014	0.0540974	0.0540465	0.0541364	0.054101	0.0541803	0.0541652	0.0541635	0.054134	0.0541315	0.0541309	0.0541634	0.0541065	0.054094	0.0541064
y4	0.0540646	0.0541112	0.0540951	0.0540808	0.0540777	0.0540621	0.0540832	0.0540791	0.0540281	0.0541139	0.0540787	0.0541578	0.0541428	0.0541411	0.0541114	0.054109	0.0541085	0.0541409	0.0541039	0.0540716	0.0540999
y5	0.0540476	0.0540939	0.0540782	0.0540639	0.0540608	0.0540438	0.0540664	0.0540623	0.0540111	0.0540932	0.0540582	0.054137	0.0541221	0.0541205	0.0540906	0.0540883	0.0540879	0.0541202	0.0541016	0.054051	0.054094
y6	0.0540328	0.0540789	0.0540635	0.0540492	0.0540461	0.054028	0.0540518	0.0540476	0.0539963	0.0540753	0.0540403	0.0541189	0.0541042	0.0541026	0.0540726	0.0540703	0.0540699	0.0541021	0.0540999	0.0540331	0.0540889
y7	0.0540208	0.0540669	0.0540517	0.0540374	0.0540342	0.0540154	0.0540401	0.0540359	0.0539844	0.0540608	0.0540259	0.0541044	0.0540898	0.0540881	0.054058	0.0540558	0.0540555	0.0540876	0.0540986	0.0540186	0.0540848
y8	0.0540123	0.0540583	0.0540433	0.0540289	0.0540258	0.0540065	0.0540316	0.0540274	0.0539758	0.0540504	0.0540156	0.0540939	0.0540794	0.0540777	0.0540476	0.0540454	0.0540452	0.0540772	0.054098	0.0540083	0.0540819
y9	0.0540075	0.0540537	0.0540387	0.0540243	0.0540211	0.0540018	0.0540269	0.0540227	0.053971	0.0540447	0.0540098	0.0540881	0.0540737	0.0540719	0.0540417	0.0540397	0.0540394	0.0540714	0.0540981	0.0540025	0.0540803
y10	0.0540067	0.054053	0.054038	0.0540236	0.0540203	0.0540015	0.0540261	0.054022	0.0539702	0.0540437	0.0540089	0.0540871	0.0540727	0.0540709	0.0540407	0.0540387	0.0540384	0.0540704	0.0540987	0.0540015	0.0540802
y11	0.0540099	0.0540565	0.0540413	0.0540268	0.0540236	0.0540054	0.0540293	0.0540251	0.0539733	0.0540476	0.0540127	0.0540909	0.0540766	0.0540748	0.0540446	0.0540427	0.0540423	0.0540743	0.0541	0.0540054	0.0540815
y12	0.0540169	0.0540639	0.0540486	0.054034	0.0540307	0.0540136	0.0540362	0.0540321	0.0539803	0.0540563	0.0540212	0.0540995	0.0540852	0.0540833	0.0540532	0.0540513	0.0540508	0.0540829	0.0541018	0.054014	0.0540841
y13	0.0540276	0.0540749	0.0540593	0.0540446	0.0540413	0.0540256	0.0540467	0.0540426	0.0539908	0.0540692	0.054034	0.0541125	0.054098	0.0540961	0.0540662	0.0540643	0.0540637	0.0540959	0.0541041	0.0540269	0.054088
y14	0.0540413	0.054089	0.0540731	0.0540584	0.0540551	0.0540409	0.0540602	0.0540562	0.0540045	0.054086	0.0540506	0.0541292	0.0541147	0.0541127	0.0540829	0.054081	0.0540803	0.0541126	0.0541067	0.0540435	0.054093
y15	0.0540575	0.0541057	0.0540894	0.0540746	0.0540712	0.0540589	0.0540762	0.0540722	0.0540206	0.0541057	0.0540702	0.054149	0.0541343	0.0541324	0.0541027	0.0541008	0.0541	0.0541324	0.0541097	0.0540631	0.0540988
y16	0.0540755	0.0541241	0.0541075	0.0540925	0.0540892	0.0540786	0.054094	0.05409	0.0540385	0.0541276	0.0540919	0.0541709	0.0541561	0.0541541	0.0541246	0.0541227	0.0541218	0.0541543	0.0541127	0.0540849	0.0541052
y17	0.0540946	0.0541436	0.0541265	0.0541115	0.0541081	0.0540994	0.0541127	0.0541088	0.0540574	0.0541507	0.0541148	0.0541941	0.0541792	0.0541771	0.0541478	0.0541459	0.0541448	0.0541775	0.0541157	0.0541079	0.0541119
y18	0.0541138	0.0541631	0.0541456	0.0541306	0.0541272	0.0541203	0.0541316	0.0541278	0.0540765	0.054174	0.0541379	0.0542174	0.0542024	0.0542003	0.0541712	0.0541692	0.054168	0.0542008	0.0541186	0.0541311	0.0541187
y19	0.0541323	0.0541819	0.0541641	0.054149	0.0541456	0.0541403	0.0541498	0.054146	0.054095	0.0541965	0.0541602	0.05424	0.0542248	0.0542228	0.0541937	0.0541917	0.0541904	0.0542234	0.0541212	0.0541535	0.0541252
y20	0.0541493	0.0541992	0.054181	0.0541659	0.0541626	0.0541586	0.0541666	0.0541628	0.054112	0.0542172	0.0541808	0.0542608	0.0542454	0.0542434	0.0542145	0.0542124	0.054211	0.0542441	0.0541235	0.0541741	0.0541311
y21	0.0541641	0.0542142	0.0541957	0.0541806	0.0541773	0.0541744	0.0541812	0.0541775	0.0541267	0.0542352	0.0541986	0.0542788	0.0542634	0.0542613	0.0542326	0.0542304	0.0542289	0.0542621	0.0541253	0.054192	0.0541363
y22	0.0541761	0.0542263	0.0542076	0.0541924	0.0541891	0.054187	0.0541929	0.0541892	0.0541387	0.0542497	0.054213	0.0542934	0.0542778	0.0542758	0.0542471	0.0542449	0.0542433	0.0542767	0.0541265	0.0542065	0.0541403
y23	0.0541846	0.0542348	0.054216	0.0542008	0.0541976	0.0541958	0.0542014	0.0541977	0.0541472	0.05426	0.0542233	0.0543038	0.0542881	0.0542861	0.0542576	0.0542552	0.0542537	0.0542871	0.0541271	0.0542168	0.0541432
y24	0.0541894	0.0542395	0.0542206	0.0542055	0.0542023	0.0542005	0.0542061	0.0542024	0.054152	0.0542658	0.0542291	0.0543097	0.0542939	0.054292	0.0542634	0.054261	0.0542595	0.0542929	0.054127	0.0542226	0.0541448
y25	0.0541902	0.0542401	0.0542213	0.0542062	0.054203	0.0542009	0.0542069	0.0542032	0.0541529	0.0542667	0.0542301	0.0543107	0.0542949	0.054293	0.0542644	0.054262	0.0542604	0.0542939	0.0541264	0.0542236	0.0541449
y26	0.054187	0.0542367	0.0542179	0.054203	0.0541997	0.0541969	0.0542037	0.0542	0.0541497	0.0542628	0.0542262	0.0543068	0.054291	0.0542891	0.0542605	0.054258	0.0542565	0.05429	0.0541251	0.0542197	0.0541436
y27	0.05418	0.0542293	0.0542107	0.0541958	0.0541926	0.0541887	0.0541968	0.054193	0.0541428	0.0542542	0.0542177	0.0542982	0.0542824	0.0542806	0.0542519	0.0542494	0.054248	0.0542813	0.0541233	0.0542111	0.054141
y28	0.0541693	0.0542183	0.0541999	0.0541852	0.054182	0.0541767	0.0541863	0.0541825	0.0541322	0.0542412	0.0542049	0.0542853	0.0542695	0.0542677	0.054239	0.0542364	0.0542351	0.0542684	0.054121	0.0541983	0.0541371
y29	0.0541556	0.0542041	0.0541861	0.0541714	0.0541683	0.0541614	0.0541728	0.0541689	0.0541186	0.0542245	0.0541884	0.0542686	0.0542529	0.0542511	0.0542222	0.0542196	0.0542185	0.0542517	0.0541184	0.0541816	0.0541322
y30	0.0541394	0.0541875	0.0541698	0.0541552	0.0541521	0.0541435	0.0541568	0.0541529	0.0541025	0.0542048	0.0541688	0.0542488	0.0542332	0.0542315	0.0542025	0.0541999	0.0541989	0.0542319	0.0541154	0.054162	0.0541263
233U/235U	0.958755	0.958945	0.958712	0.958861	0.95881	0.958802	0.958789	0.95883	0.958853	0.958845	0.95884	0.958915	0.958806	0.958845	0.958933	0.959109	0.958987	0.95903	0.95883	0.95883	0.95883
238U/235U	1.99225	1.99242	1.99299	1.99246	1.99238	1.99268	1.99236	1.99263	1.99257	1.99265	1.99278	1.99251	1.99251	1.99249	1.99234	1.99221	1.99229	1.99181	1.99263	1.99263	1.99263
var 3/5	6.59565e-10	1.82828e-09	1.19048e-09	1.22887e-09	4.97966e-10	1.75382e-09	4.6059e-10	3.93973e-10	7.80737e-10	3.46381e-10	3.46345e-10	1.28372e-09	7.80634e-10	6.31574e-10	6.22236e-10	6.67163e-10	1.15555e-09	1.07618e-09	3.93973e-10	3.93973e-10	3.93973e-10
var 8/5	2.6479e-09	5.23675e-09	2.98803e-09	3.94784e-09	1.64893e-09	6.61164e-09	2.61287e-09	1.57194e-09	2.54463e-09	1.33932e-09	1.50567e-09	3.68585e-09	1.27958e-09	2.41709e-09	3.09436e-09	2.35084e-09	3.79306e-09	4.42142e-09	1.57194e-09	1.57194e-09	1.57194e-09
cov 3/5-8/5	1.21466e-10	1.06535e-09	1.32292e-10	1.97256e-10	-5.99501e-11	1.27898e-09	-1.39847e-10	8.92043e-11	4.90461e-10	-1.59022e-11	-2.2605e-11	8.60788e-10	2.6866e-10	3.8244e-10	5.38838e-10	4.26901e-10	1.00208e-09	6.81202e-10	8.92043e-11	8.92043e-11	8.92043e-11
conf. int.	0.95	0.95	0.95	0.95	0.95	0.95	0.95	0.95	0.95	0.95	0.95	0.95	0.95	0.95	0.95	0.95	0.95	0.95	0.95	0.95	0.95
chi-sq	5.99146	5.99146	5.99146	5.99146	5.99146	5.99146	5.99146	5.99146	5.99146	5.99146	5.99146	5.99146	5.99146	5.99146	5.99146	5.99146	5.99146	5.99146	5.99146	5.99146	5.99146
trace	3.30746e-09	7.06504e-09	4.17851e-09	5.17671e-09	2.1469e-09	8.36546e-09	3.07346e-09	1.96591e-09	3.32537e-09	1.6857e-09	1.85201e-09	4.96958e-09	2.06022e-09	3.04867e-09	3.71659e-09	3.018e-09	4.94861e-09	5.49759e-09	1.96591e-09	1.96591e-09	1.96591e-09
det	1.7317e-18	8.43929e-18	3.5397e-18	4.81247e-18	8.17517e-19	9.95985e-18	1.1839e-18	6.11344e-19	1.74614e-18	4.63661e-19	5.20969e-19	3.99065e-18	9.26707e-19	1.38031e-18	1.63508e-18	1.38615e-18	3.37889e-18	4.29419e-18	6.11344e-19	6.11344e-19	6.11344e-19
eig1	2.65529e-09	5.54234e-09	2.99771e-09	3.96207e-09	1.65204e-09	6.92779e-09	2.62191e-09	1.57866e-09	2.67183e-09	1.33957e-09	1.50611e-09	3.96246e-09	1.39673e-09	2.49556e-09	3.2067e-09	2.45289e-09	4.13059e-09	4.55481e-09	1.57866e-09	1.57866e-09	1.57866e-09
eig2	6.52172e-10	1.52269e-09	1.1808e-09	1.21463e-09	4.94852e-10	1.43767e-09	4.51542e-10	3.87256e-10	6.53535e-10	3.46126e-10	3.45904e-10	1.00711e-09	6.63481e-10	5.53107e-10	5.09893e-10	5.65107e-10	8.18016e-10	9.42779e-10	3.87256e-10	3.87256e-10	3.87256e-10
axis a	0.000126131	0.000182227	0.000134018	0.000154073	9.94895e-05	0.000203734	0.000125336	9.72547e-05	0.000126524	8.95879e-05	9.49936e-05	0.000154081	9.14794e-05	0.000122279	0.00013861	0.000121229	0.000157316	0.000165197	9.72547e-05	9.72547e-05	9.72547e-05
axis b	6.25097e-05	9.55153e-05	8.41113e-05	8.53079e-05	5.44508e-05	9.28101e-05	5.20134e-05	4.81688e-05	6.2575e-05	4.5539e-05	4.55244e-05	7.76794e-05	6.30494e-05	5.75667e-05	5.52721e-05	5.81878e-05	7.0008e-05	7.51574e-05	4.81688e-05	4.81688e-05	4.81688e-05
θ (rad)	1.51001	1.29145	1.49773	1.49875	1.6227	1.32846	1.63541	1.49564	1.31703	1.58681	1.59028	1.25988	1.15959	1.36843	1.36525	1.33614	1.2459	1.37742	1.49564	1.49564	1.49564
θ (deg)	86.5171	73.9949	85.8133	85.8721	92.9736	76.1151	93.7021	85.6939	75.4605	90.9173	91.1166	72.1857	66.4397	78.4054	78.2231	76.5551	71.385	78.9203	85.6939	85.6939	85.6939
Q 11	0.060751	0.275724	0.0730061	0.0719831	-0.0518764	0.239972	-0.0645695	0.0750854	0.251047	-0.0160091	-0.0194873	0.305933	0.399714	0.200986	0.204102	0.232511	0.319207	0.192174	0.0750854	0.0750854	0.0750854
Q12	-0.998153	-0.961237	-0.997331	-0.997406	-0.998654	-0.97078	-0.997913	-0.997177	-0.967975	-0.999872	-0.99981	-0.952053	-0.91664	-0.979594	-0.97895	-0.972594	-0.947685	-0.981361	-0.997177	-0.997177	-0.997177
Q21	0.998153	0.961237	0.997331	0.997406	0.998654	0.97078	0.997913	0.997177	0.967975	0.999872	0.99981	0.952053	0.91664	0.979594	0.97895	0.972594	0.947685	0.981361	0.997177	0.997177	0.997177
Q22	0.060751	0.275724	0.0730061	0.0719831	-0.0518764	0.239972	-0.0645695	0.0750854	0.251047	-0.0160091	-0.0194873	0.305933	0.399714	0.200986	0.204102	0.232511	0.319207	0.192174	0.0750854	0.0750854	0.0750854
e0	0	0	0	0	0	0	0	0	0	0	0	0	0	0	0	0	0	0	0	0	0
e1	0.20944	0.20944	0.20944	0.20944	0.20944	0.20944	0.20944	0.20944	0.20944	0.20944	0.20944	0.20944	0.20944	0.20944	0.20944	0.20944	0.20944	0.20944	0.20944	0.20944	0.20944
e2	0.418879	0.418879	0.418879	0.418879	0.418879	0.418879	0.418879	0.418879	0.418879	0.418879	0.418879	0.418879	0.418879	0.418879	0.418879	0.418879	0.418879	0.418879	0.418879	0.418879	0.418879
e3	0.628319	0.628319	0.628319	0.628319	0.628319	0.628319	0.628319	0.628319	0.628319	0.628319	0.628319	0.628319	0.628319	0.628319	0.628319	0.628319	0.628319	0.628319	0.628319	0.628319	0.628319
e4	0.837758	0.837758	0.837758	0.837758	0.837758	0.837758	0.837758	0.837758	0.837758	0.837758	0.837758	0.837758	0.837758	0.837758	0.837758	0.837758	0.837758	0.837758	0.837758	0.837758	0.837758
e5	1.0472	1.0472	1.0472	1.0472	1.0472	1.0472	1.0472	1.0472	1.0472	1.0472	1.0472	1.0472	1.0472	1.0472	1.0472	1.0472	1.0472	1.0472	1.0472	1.0472	1.0472
e6	1.25664	1.25664	1.25664	1.25664	1.25664	1.25664	1.25664	1.25664	1.25664	1.25664	1.25664	1.25664	1.25664	1.25664	1.25664	1.25664	1.25664	1.25664	1.25664	1.25664	1.25664
e7	1.46608	1.46608	1.46608	1.46608	1.46608	1.46608	1.46608	1.46608	1.46608	1.46608	1.46608	1.46608	1.46608	1.46608	1.46608	1.46608	1.46608	1.46608	1.46608	1.46608	1.46608
e8	1.67552	1.67552	1.67552	1.67552	1.67552	1.67552	1.67552	1.67552	1.67552	1.67552	1.67552	1.67552	1.67552	1.67552	1.67552	1.67552	1.67552	1.67552	1.67552	1.67552	1.67552
e9	1.88496	1.88496	1.88496	1.88496	1.88496	1.88496	1.88496	1.88496	1.88496	1.88496	1.88496	1.88496	1.88496	1.88496	1.88496	1.88496	1.88496	1.88496	1.88496	1.88496	1.88496
e10	2.0944	2.0944	2.0944	2.0944	2.0944	2.0944	2.0944	2.0944	2.0944	2.0944	2.0944	2.0944	2.0944	2.0944	2.0944	2.0944	2.0944	2.0944	2.0944	2.0944	2.0944
e11	2.30383	2.30383	2.30383	2.30383	2.30383	2.30383	2.30383	2.30383	2.30383	2.30383	2.30383	2.30383	2.30383	2.30383	2.30383	2.30383	2.30383	2.30383	2.30383	2.30383	2.30383
e12	2.51327	2.51327	2.51327	2.51327	2.51327	2.51327	2.51327	2.51327	2.51327	2.51327	2.51327	2.51327	2.51327	2.51327	2.51327	2.51327	2.51327	2.51327	2.51327	2.51327	2.51327
e13	2.72271	2.72271	2.72271	2.72271	2.72271	2.72271	2.72271	2.72271	2.72271	2.72271	2.72271	2.72271	2.72271	2.72271	2.72271	2.72271	2.72271	2.72271	2.72271	2.72271	2.72271
e14	2.93215	2.93215	2.93215	2.93215	2.93215	2.93215	2.93215	2.93215	2.93215	2.93215	2.93215	2.93215	2.93215	2.93215	2.93215	2.93215	2.93215	2.93215	2.93215	2.93215	2.93215
e15	3.14159	3.14159	3.14159	3.14159	3.14159	3.14159	3.14159	3.14159	3.14159	3.14159	3.14159	3.14159	3.14159	3.14159	3.14159	3.14159	3.14159	3.14159	3.14159	3.14159	3.14159
e16	3.35103	3.35103	3.35103	3.35103	3.35103	3.35103	3.35103	3.35103	3.35103	3.35103	3.35103	3.35103	3.35103	3.35103	3.35103	3.35103	3.35103	3.35103	3.35103	3.35103	3.35103
e17	3.56047	3.56047	3.56047	3.56047	3.56047	3.56047	3.56047	3.56047	3.56047	3.56047	3.56047	3.56047	3.56047	3.56047	3.56047	3.56047	3.56047	3.56047	3.56047	3.56047	3.56047
e18	3.76991	3.76991	3.76991	3.76991	3.76991	3.76991	3.76991	3.76991	3.76991	3.76991	3.76991	3.76991	3.76991	3.76991	3.76991	3.76991	3.76991	3.76991	3.76991	3.76991	3.76991
e19	3.97935	3.97935	3.97935	3.97935	3.97935	3.97935	3.97935	3.97935	3.97935	3.97935	3.97935	3.97935	3.97935	3.97935	3.97935	3.97935	3.97935	3.97935	3.97935	3.97935	3.97935
e20	4.18879	4.18879	4.18879	4.18879	4.18879	4.18879	4.18879	4.18879	4.18879	4.18879	4.18879	4.18879	4.18879	4.18879	4.18879	4.18879	4.18879	4.18879	4.18879	4.18879	4.18879
e21	4.39823	4.39823	4.39823	4.39823	4.39823	4.39823	4.39823	4.39823	4.39823	4.39823	4.39823	4.39823	4.39823	4.39823	4.39823	4.39823	4.39823	4.39823	4.39823	4.39823	4.39823
e22	4.60767	4.60767	4.60767	4.60767	4.60767	4.60767	4.60767	4.60767	4.60767	4.60767	4.60767	4.60767	4.60767	4.60767	4.60767	4.60767	4.60767	4.60767	4.60767	4.60767	4.60767
e23	4.81711	4.81711	4.81711	4.81711	4.81711	4.81711	4.81711	4.81711	4.81711	4.81711	4.81711	4.81711	4.81711	4.81711	4.81711	4.81711	4.81711	4.81711	4.81711	4.81711	4.81711
e24	5.02655	5.02655	5.02655	5.02655	5.02655	5.02655	5.02655	5.02655	5.02655	5.02655	5.02655	5.02655	5.02655	5.02655	5.02655	5.02655	5.02655	5.02655	5.02655	5.02655	5.02655
e25	5.23599	5.23599	5.23599	5.23599	5.23599	5.23599	5.23599	5.23599	5.23599	5.23599	5.23599	5.23599	5.23599	5.23599	5.23599	5.23599	5.23599	5.23599	5.23599	5.23599	5.23599
e26	5.44543	5.44543	5.44543	5.44543	5.44543	5.44543	5.44543	5.44543	5.44543	5.44543	5.44543	5.44543	5.44543	5.44543	5.44543	5.44543	5.44543	5.44543	5.44543	5.44543	5.44543
e27	5.65487	5.65487	5.65487	5.65487	5.65487	5.65487	5.65487	5.65487	5.65487	5.65487	5.65487	5.65487	5.65487	5.65487	5.65487	5.65487	5.65487	5.65487	5.65487	5.65487	5.65487
e28	5.86431	5.86431	5.86431	5.86431	5.86431	5.86431	5.86431	5.86431	5.86431	5.86431	5.86431	5.86431	5.86431	5.86431	5.86431	5.86431	5.86431	5.86431	5.86431	5.86431	5.86431
e29	6.07375	6.07375	6.07375	6.07375	6.07375	6.07375	6.07375	6.07375	6.07375	6.07375	6.07375	6.07375	6.07375	6.07375	6.07375	6.07375	6.07375	6.07375	6.07375	6.07375	6.07375
e30	6.28319	6.28319	6.28319	6.28319	6.28319	6.28319	6.28319	6.28319	6.28319	6.28319	6.28319	6.28319	6.28319	6.28319	6.28319	6.28319	6.28319	6.28319	6.28319	6.28319	6.28319
x0	0.958763	0.958995	0.958721	0.958873	0.958805	0.95885	0.958781	0.958837	0.958884	0.958844	0.958839	0.958962	0.958842	0.95887	0.958961	0.959137	0.959037	0.959062	0.958837	0.958837	0.958837
x1	0.95875	0.958975	0.958704	0.958855	0.958793	0.958831	0.95877	0.958827	0.958871	0.958834	0.958829	0.958946	0.958829	0.958858	0.958949	0.959124	0.959022	0.959046	0.958827	0.958827	0.958827
x2	0.958737	0.958953	0.958686	0.958837	0.958783	0.95881	0.95876	0.958817	0.958857	0.958825	0.95882	0.958928	0.958816	0.958845	0.958937	0.959111	0.959006	0.959029	0.958817	0.958817	0.958817
x3	0.958725	0.958931	0.95867	0.95882	0.958774	0.958788	0.958752	0.958808	0.958843	0.958817	0.958812	0.95891	0.958801	0.958832	0.958924	0.959098	0.958989	0.959012	0.958808	0.958808	0.958808
x4	0.958714	0.95891	0.958656	0.958806	0.958766	0.958767	0.958745	0.958799	0.958829	0.95881	0.958805	0.958892	0.958787	0.95882	0.958911	0.959085	0.958971	0.958996	0.958799	0.958799	0.958799
x5	0.958705	0.95889	0.958644	0.958793	0.95876	0.958748	0.95874	0.958792	0.958816	0.958805	0.9588	0.958875	0.958774	0.958809	0.9589	0.959074	0.958955	0.958982	0.958792	0.958792	0.958792
x6	0.958698	0.958873	0.958635	0.958784	0.958756	0.958731	0.958737	0.958787	0.958805	0.958801	0.958796	0.958859	0.958762	0.958799	0.95889	0.959063	0.958939	0.95897	0.958787	0.958787	0.958787
x7	0.958694	0.958859	0.958629	0.958778	0.958755	0.958717	0.958736	0.958783	0.958796	0.9588	0.958795	0.958847	0.958752	0.958792	0.958882	0.959055	0.958926	0.95896	0.958783	0.958783	0.958783
x8	0.958692	0.958848	0.958627	0.958776	0.958756	0.958707	0.958738	0.958781	0.958789	0.9588	0.958795	0.958837	0.958744	0.958787	0.958876	0.959049	0.958916	0.958953	0.958781	0.958781	0.958781
x9	0.958694	0.958842	0.958629	0.958777	0.95876	0.958701	0.958742	0.958782	0.958785	0.958802	0.958798	0.95883	0.958739	0.958784	0.958872	0.959046	0.958908	0.95895	0.958782	0.958782	0.958782
x10	0.958697	0.95884	0.958634	0.958782	0.958765	0.958699	0.958748	0.958785	0.958784	0.958806	0.958802	0.958828	0.958737	0.958784	0.958872	0.959045	0.958904	0.95895	0.958785	0.958785	0.958785
x11	0.958704	0.958843	0.958643	0.958791	0.958773	0.958702	0.958756	0.958789	0.958786	0.958812	0.958808	0.958829	0.958738	0.958787	0.958874	0.959048	0.958904	0.958954	0.958789	0.958789	0.958789
x12	0.958712	0.95885	0.958654	0.958802	0.958782	0.958709	0.958765	0.958796	0.958791	0.958819	0.958815	0.958834	0.958742	0.958792	0.958878	0.959052	0.958907	0.958961	0.958796	0.958796	0.958796
x13	0.958723	0.958862	0.958669	0.958817	0.958792	0.95872	0.958775	0.958804	0.958799	0.958828	0.958824	0.958842	0.958749	0.9588	0.958885	0.95906	0.958914	0.958971	0.958804	0.958804	0.958804
x14	0.958735	0.958877	0.958685	0.958833	0.958804	0.958735	0.958786	0.958813	0.958809	0.958837	0.958833	0.958854	0.958758	0.95881	0.958894	0.959069	0.958924	0.958984	0.958813	0.958813	0.958813
x15	0.958748	0.958895	0.958702	0.95885	0.958815	0.958753	0.958797	0.958823	0.958821	0.958846	0.958842	0.958868	0.958769	0.958821	0.958904	0.95908	0.958937	0.958998	0.958823	0.958823	0.958823
x16	0.958761	0.958915	0.958719	0.958868	0.958826	0.958772	0.958807	0.958833	0.958834	0.958856	0.958852	0.958884	0.958782	0.958833	0.958916	0.959093	0.958952	0.959014	0.958833	0.958833	0.958833
x17	0.958774	0.958936	0.958737	0.958886	0.958837	0.958794	0.958817	0.958843	0.958848	0.958865	0.958861	0.958902	0.958796	0.958846	0.958929	0.959106	0.958968	0.959031	0.958843	0.958843	0.958843
x18	0.958786	0.958958	0.958753	0.958903	0.958846	0.958815	0.958826	0.958852	0.958862	0.958873	0.958869	0.958921	0.95881	0.958859	0.958942	0.959119	0.958985	0.959048	0.958852	0.958852	0.958852
x19	0.958797	0.958979	0.958767	0.958917	0.958854	0.958836	0.958833	0.958861	0.958876	0.95888	0.958875	0.958939	0.958824	0.958871	0.958954	0.959132	0.959003	0.959064	0.958861	0.958861	0.958861
x20	0.958806	0.958999	0.958779	0.95893	0.958859	0.958855	0.958838	0.958868	0.958889	0.958885	0.958881	0.958956	0.958837	0.958882	0.958965	0.959143	0.959019	0.959078	0.958868	0.958868	0.958868
x21	0.958812	0.959017	0.958788	0.958939	0.958863	0.958872	0.958841	0.958873	0.9589	0.958889	0.958884	0.958971	0.958849	0.958891	0.958975	0.959154	0.959035	0.95909	0.958873	0.958873	0.958873
x22	0.958817	0.959031	0.958794	0.958945	0.958864	0.958886	0.958841	0.958877	0.958909	0.95889	0.958886	0.958984	0.958859	0.958899	0.958984	0.959162	0.959048	0.9591	0.958877	0.958877	0.958877
x23	0.958818	0.959041	0.958796	0.958947	0.958863	0.958896	0.958839	0.958879	0.958916	0.95889	0.958885	0.958994	0.958867	0.958904	0.958989	0.959168	0.959058	0.959107	0.958879	0.958879	0.958879
x24	0.958817	0.959048	0.958794	0.958946	0.95886	0.958902	0.958836	0.958878	0.95892	0.958888	0.958883	0.959	0.958872	0.958907	0.958993	0.959171	0.959066	0.95911	0.958878	0.958878	0.958878
x25	0.958813	0.959049	0.958789	0.958941	0.958854	0.958904	0.95883	0.958875	0.958921	0.958884	0.958879	0.959003	0.958874	0.958906	0.958994	0.959172	0.959069	0.95911	0.958875	0.958875	0.958875
x26	0.958807	0.959047	0.95878	0.958932	0.958847	0.958901	0.958822	0.958871	0.958919	0.958878	0.958873	0.959002	0.958873	0.958904	0.958992	0.959169	0.95907	0.959106	0.958871	0.958871	0.958871
x27	0.958798	0.959039	0.958769	0.95892	0.958838	0.958894	0.958813	0.958864	0.958914	0.958871	0.958866	0.958997	0.958869	0.958898	0.958987	0.959165	0.959067	0.959099	0.958864	0.958864	0.958864
x28	0.958788	0.959028	0.958755	0.958906	0.958827	0.958883	0.958802	0.958856	0.958906	0.958862	0.958857	0.958988	0.958863	0.958891	0.958981	0.959157	0.95906	0.959089	0.958856	0.958856	0.958856
x29	0.958776	0.959013	0.958739	0.95889	0.958816	0.958868	0.958792	0.958847	0.958896	0.958853	0.958848	0.958977	0.958853	0.958881	0.958972	0.959148	0.95905	0.959076	0.958847	0.958847	0.958847
x30	0.958763	0.958995	0.958721	0.958873	0.958805	0.95885	0.958781	0.958837	0.958884	0.958844	0.958839	0.958962	0.958842	0.95887	0.958961	0.959137	0.959037	0.959062	0.958837	0.958837	0.958837
y0	1.99238	1.99259	1.99312	1.99262	1.99248	1.99288	1.99249	1.99272	1.99269	1.99274	1.99287	1.99265	1.9926	1.99261	1.99248	1.99232	1.99244	1.99197	1.99272	1.99272	1.99272
y1	1.99238	1.99259	1.99312	1.99261	1.99247	1.99288	1.99248	1.99272	1.99269	1.99273	1.99287	1.99265	1.9926	1.99261	1.99248	1.99232	1.99244	1.99197	1.99272	1.99272	1.99272
y2	1.99237	1.99259	1.99311	1.99261	1.99247	1.99287	1.99247	1.99272	1.99268	1.99273	1.99287	1.99265	1.9926	1.9926	1.99247	1.99232	1.99243	1.99196	1.99272	1.99272	1.99272
y3	1.99236	1.99257	1.9931	1.99259	1.99246	1.99285	1.99246	1.99271	1.99267	1.99272	1.99286	1.99264	1.9926	1.99259	1.99246	1.99231	1.99242	1.99195	1.99271	1.99271	1.99271
y4	1.99234	1.99255	1.99308	1.99257	1.99244	1.99283	1.99244	1.99269	1.99266	1.99271	1.99284	1.99262	1.99259	1.99258	1.99244	1.99229	1.9924	1.99193	1.99269	1.99269	1.99269
y5	1.99232	1.99253	1.99306	1.99254	1.99242	1.9928	1.99242	1.99268	1.99264	1.99269	1.99283	1.9926	1.99258	1.99256	1.99242	1.99228	1.99238	1.9919	1.99268	1.99268	1.99268
y6	1.9923	1.99249	1.99303	1.99252	1.9924	1.99276	1.9924	1.99266	1.99262	1.99267	1.99281	1.99257	1.99256	1.99254	1.99239	1.99226	1.99236	1.99187	1.99266	1.99266	1.99266
y7	1.99227	1.99246	1.99301	1.99248	1.99238	1.99272	1.99237	1.99264	1.99259	1.99265	1.99279	1.99255	1.99255	1.99251	1.99237	1.99223	1.99233	1.99184	1.99264	1.99264	1.99264
y8	1.99225	1.99242	1.99298	1.99245	1.99236	1.99268	1.99235	1.99262	1.99257	1.99264	1.99277	1.99251	1.99253	1.99249	1.99234	1.99221	1.9923	1.9918	1.99262	1.99262	1.99262
y9	1.99222	1.99239	1.99295	1.99242	1.99234	1.99264	1.99232	1.9926	1.99254	1.99262	1.99275	1.99248	1.99251	1.99246	1.99231	1.99218	1.99226	1.99177	1.9926	1.9926	1.9926
y10	1.9922	1.99235	1.99293	1.99239	1.99232	1.9926	1.9923	1.99258	1.99252	1.9926	1.99273	1.99245	1.99249	1.99244	1.99228	1.99216	1.99223	1.99174	1.99258	1.99258	1.99258
y11	1.99217	1.99232	1.9929	1.99236	1.99231	1.99257	1.99228	1.99256	1.9925	1.99259	1.99272	1.99243	1.99248	1.99242	1.99226	1.99214	1.99221	1.99171	1.99256	1.99256	1.99256
y12	1.99216	1.99229	1.99288	1.99234	1.99229	1.99253	1.99226	1.99255	1.99248	1.99257	1.9927	1.9924	1.99246	1.9924	1.99224	1.99212	1.99218	1.99168	1.99255	1.99255	1.99255
y13	1.99214	1.99227	1.99287	1.99232	1.99228	1.99251	1.99225	1.99254	1.99246	1.99256	1.99269	1.99238	1.99245	1.99238	1.99222	1.9921	1.99216	1.99166	1.99254	1.99254	1.99254
y14	1.99213	1.99225	1.99286	1.99231	1.99228	1.99249	1.99224	1.99253	1.99245	1.99256	1.99269	1.99237	1.99244	1.99237	1.99221	1.99209	1.99215	1.99165	1.99253	1.99253	1.99253
y15	1.99213	1.99224	1.99285	1.99231	1.99228	1.99248	1.99224	1.99253	1.99244	1.99256	1.99268	1.99236	1.99243	1.99237	1.99221	1.99209	1.99214	1.99164	1.99253	1.99253	1.99253
y16	1.99213	1.99224	1.99285	1.99231	1.99228	1.99248	1.99224	1.99253	1.99244	1.99256	1.99269	1.99236	1.99243	1.99237	1.99221	1.99209	1.99214	1.99164	1.99253	1.99253	1.99253
y17	1.99214	1.99224	1.99286	1.99232	1.99229	1.99249	1.99225	1.99254	1.99245	1.99256	1.99269	1.99236	1.99243	1.99237	1.99221	1.99209	1.99214	1.99165	1.99254	1.99254	1.99254
y18	1.99215	1.99226	1.99288	1.99233	1.9923	1.99251	1.99226	1.99255	1.99246	1.99257	1.9927	1.99237	1.99243	1.99238	1.99222	1.9921	1.99215	1.99167	1.99255	1.99255	1.99255
y19	1.99217	1.99228	1.99289	1.99235	1.99231	1.99253	1.99228	1.99256	1.99247	1.99259	1.99272	1.99239	1.99244	1.9924	1.99224	1.99212	1.99217	1.99169	1.99256	1.99256	1.99256
y20	1.99219	1.99231	1.99291	1.99238	1.99233	1.99256	1.9923	1.99258	1.99249	1.9926	1.99273	1.99241	1.99245	1.99242	1.99226	1.99214	1.99219	1.99171	1.99258	1.99258	1.99258
y21	1.99221	1.99234	1.99294	1.99241	1.99235	1.9926	1.99233	1.99259	1.99251	1.99262	1.99275	1.99244	1.99246	1.99244	1.99229	1.99216	1.99222	1.99174	1.99259	1.99259	1.99259
y22	1.99224	1.99237	1.99297	1.99244	1.99237	1.99264	1.99235	1.99261	1.99254	1.99264	1.99277	1.99247	1.99248	1.99246	1.99232	1.99218	1.99225	1.99177	1.99261	1.99261	1.99261
y23	1.99226	1.99241	1.99299	1.99247	1.99239	1.99268	1.99238	1.99263	1.99256	1.99266	1.99279	1.9925	1.9925	1.99249	1.99234	1.9922	1.99228	1.99181	1.99263	1.99263	1.99263
y24	1.99229	1.99244	1.99302	1.9925	1.99241	1.99272	1.9924	1.99265	1.99259	1.99267	1.99281	1.99253	1.99252	1.99251	1.99237	1.99223	1.99231	1.99184	1.99265	1.99265	1.99265
y25	1.99231	1.99248	1.99305	1.99253	1.99243	1.99276	1.99243	1.99267	1.99261	1.99269	1.99283	1.99256	1.99253	1.99254	1.9924	1.99225	1.99234	1.99187	1.99267	1.99267	1.99267
y26	1.99234	1.99251	1.99307	1.99256	1.99245	1.9928	1.99245	1.99269	1.99264	1.99271	1.99284	1.99259	1.99255	1.99256	1.99242	1.99227	1.99237	1.9919	1.99269	1.99269	1.99269
y27	1.99235	1.99254	1.99309	1.99258	1.99246	1.99283	1.99246	1.9927	1.99266	1.99272	1.99286	1.99261	1.99257	1.99258	1.99244	1.99229	1.9924	1.99193	1.9927	1.9927	1.9927
y28	1.99237	1.99256	1.99311	1.9926	1.99247	1.99285	1.99248	1.99271	1.99267	1.99273	1.99287	1.99263	1.99258	1.99259	1.99246	1.99231	1.99242	1.99195	1.99271	1.99271	1.99271
y29	1.99238	1.99258	1.99312	1.99261	1.99247	1.99287	1.99248	1.99272	1.99268	1.99273	1.99287	1.99264	1.99259	1.9926	1.99247	1.99232	1.99243	1.99196	1.99272	1.99272	1.99272
y30	1.99238	1.99259	1.99312	1.99262	1.99248	1.99288	1.99249	1.99272	1.99269	1.99274	1.99287	1.99265	1.9926	1.99261	1.99248	1.99232	1.99244	1.99197	1.99272	1.99272	1.99272
